# Supplementary material
Source: PubMed Central journal article supplement (PMC10510671)
Supplement: ml3c00143_si_002.pdf [file ml3c00143_si_002.pdf]

## SUPPORTING INFORMATION

### **Discovery and *In Vitro* Characterization of SPL028: Deuterated *N,N*-Dimethyltryptamine**

Marie Layzell<sup>\*</sup>,<sup>1</sup> Peter Rands,<sup>1</sup> Meghan Good,<sup>1</sup> Zelah Joel,<sup>1</sup> Rick Cousins,<sup>2</sup> Tiffanie Benway,<sup>1</sup> Ellen James,<sup>1</sup> Carol Routledge<sup>1</sup>

<sup>1</sup>Small Pharma., 50 Featherstone Street, London, EC1Y 8RT

<sup>2</sup>Cinnabar Consulting Ltd., 43 Pedley Lane, Clifton, Beds SG17 5QT, UK

## TABLE OF CONTENTS

|     |                                                                               |    |
|-----|-------------------------------------------------------------------------------|----|
| S1. | Chemistry, Experimental Information.....                                      | 3  |
| S2. | <i>In Vitro</i> Studies, Experimental Information .....                       | 12 |
| S3. | <sup>1</sup> H-NMR data for test compounds 7, 9i-9vi, 12 and 14.....          | 17 |
| S4. | HPLC data for test compounds 7, 9i-9vi, 12 and 14.....                        | 26 |
| S5. | Table S1: Mean In Vitro Percent Inhibition with 10 μM 9i.....                 | 35 |
| S6. | Table S2. In Vitro Receptor, Transporter and Ion Channel Binding Assays ..... | 41 |
| S7. | Table S3: <i>In Vitro</i> Enzyme Inhibition Assays.....                       | 69 |

Throughout the testing process, no unexpected or unusually high safety hazards were encountered. Continue to adhere to standard safety protocols for a safe working environment.

## **S1. Chemistry, Experimental Information**

**General Synthetic Methods.** Reagents and solvents were obtained from commercial suppliers and used without further purification. Organic solutions were concentrated under reduced pressure on a rotary evaporator using a water bath. All new compounds gave satisfactory <sup>1</sup>H NMR, HPLC and LC/MS results. All final compounds have an HPLC purity of  $\geq 95\%$ . HPLC analyses were performed using the following conditions on Agilent 1100/1200 series liquid chromatograph or equivalent:

### Analytical HPLC Method A

Column: Triart Phenyl 3.0  $\mu\text{m}$ , 4.6  $\times$  150 mm. Mobile phase: A = Deionised H<sub>2</sub>O:TFA (100:0.05); B = Acetonitrile:TFA (100:0.05). Gradient: T = 0, 95% solvent A, 5% solvent B; T = 13 min, 62% solvent A, 38% solvent B; T = 26 min, 5% solvent A, 95% solvent B; T = 30.5 min, 5% solvent A, 95% solvent B; T = 31 min, 95% solvent A, 5% solvent B; stop time, 31 min. Flow = 1.0 mL/min. UV 220 nm.

### Analytical HPLC Method B

Column: Acquity BEH Phenyl 4.6 x 30 mm; 1.7  $\mu\text{m}$  particle size. Mobile phase: A = Deionised H<sub>2</sub>O:TFA (100:0.03); B = Acetonitrile:TFA (100:0.03). Gradient: T = 0, 95% solvent A, 5% solvent B; T = 5 min, 95% solvent A, 5% solvent B; T = 15 min, 5% solvent A, 95% solvent B; T = 16 min, 5% solvent A, 95% solvent B; T = 16.5 min, 95% solvent A, 5% solvent B; stop time, 17 min. Flow = 2.0 mL/min. UV 220 nm.

## Analytical HPLC-MS

HPLC: Column: Triart Phenyl 3.0  $\mu\text{m}$ , 4.6  $\times$  150 mm. Mobile phase: A = Deionised H<sub>2</sub>O:TFA (100:0.05); B = Acetonitrile:TFA (100:0.05).

Gradient: T = 0, 95% solvent A, 5% solvent B; T = 13 min, 62% solvent A, 38% solvent B; T = 26 min, 5% solvent A, 95% solvent B; T = 30.5 min, 5% solvent A, 95% solvent B; T = 31 min, 95% solvent A, 5% solvent B; stop time, 31 min. Flow = 1.0 mL/min. UV 220 nm.

Mass Spectrometry: System: Agilent 6100 series Quadrupole LC-MS or equivalent. Drying gas flow: 12.0 L/min. Drying gas temp: 350°C.

Nebulizer pressure: 35 psig. Fragmentor: 110V. Gain: 1.0.

<sup>1</sup>H Nuclear magnetic resonance (NMR) spectra were recorded on a Jeol AS400 spectrometer (399.78 MHz), except for **9i** which was recorded on a Bruker Avance Neo spectrometer (400.13 MHz). All spectra were recorded at room temperature. Chemical shifts are reported in ppm relative to deuterated solvent as an internal standard ( $\delta_{\text{H}}$  DMSO-d<sub>6</sub> 2.50 ppm,  $\delta_{\text{H}}$  chloroform-d 7.26 ppm,) with the following convention for describing multiplicity (s = singlet, d = doublet, t = triplet, q = quartet, quint = quintet, m = multiplet, br = broad signal, dd = doublet of doublets, etc.).

**Indole-3-(*N,N*-dimethyl)-acetamide (6).** To a 5 L vessel under nitrogen was charged indole-3-acetic acid (**4**) (1 equiv, 1.467 mol), 1-hydroxybenzotriazole (~20% wet) (1.2 eq, 1.760mol) and dichloromethane (DCM) (2313mL) to give a milky white suspension. N-Ethyl-N'-(3-dimethylaminopropyl)carbodiimide hydrochloride (1.2 eq, 1.760 mol) was then charged portion-wise over 5 min at 16–22°C. The reaction mixture was stirred for 2 hours at ambient temperature before 2M dimethylamine in THF (1.5 eq, 2.200mol) was charged dropwise over 20 minutes at 20–30°C. The resultant solution was stirred at ambient temperature for 1 hour where HPLC Method A indicated 1.1% indole-3-acetic

acid (**4**) remained and 98.1% of **Indole-3-(*N,N*-dimethyl)-acetamide (6)**. The reaction mixture was then charged with 10% K<sub>2</sub>CO<sub>3</sub> (1285 mL) and stirred for 5 min. The layers were separated, and the upper aqueous layer extracted with DCM (643 mL x 2). The organic extracts were combined and washed with saturated brine (643 mL). The organic extracts were then dried over MgSO<sub>4</sub>, filtered and concentrated in vacuo at 45°C. This provided 303.1 g of crude **Indole-3-(*N,N*-dimethyl)-acetamide (6)** as an off-white sticky solid. The crude material was then subjected to a slurry in tert-butyl methyl ether (TBME) (2570 mL) at 50°C for 2 hours before being cooled to ambient temperature, filtered and washed with TBME (514mL x 2). The filter cake was then dried in vacuo at 50°C to afford **Indole-3-(*N,N*-dimethyl)-acetamide (6)** as an off-white solid; yield 90% (266.2 g, 2.81 mol). <sup>1</sup>H NMR (399.78 MHz, [D<sub>1</sub>]CHCl<sub>3</sub>): δ = 8.82 (br s, 1H), 7.64 (d, *J* = 8 Hz, 1H), 7.31 (d, *J* = 8.4 Hz, 1H), 7.18 (t, *J* = 7.2 Hz, 1H), 7.12 (d, *J* = 7.2 Hz, 1H), 6.96 (s, 1H), 3.83 (s, 2H), 2.99-3.00 (2 x s, 6H). HPLC method A: retention time = 13.97 min; peak area, 98.5%.

**3-(3-Methylbutyl)-1H-indole or *N,N*-Dimethyltryptamine (1)**. To a 5L vessel under nitrogen was charged **indole-3-(*N,N*-dimethyl)-acetamide (6)** (272.5 g, 1.347 mol) and THF (1363 mL) to give an off-white suspension. 2 M LiAlH<sub>4</sub> in THF (505.3 mL, 1.213 mol) was then charged dropwise over 35 minutes at 20–56°C to give an amber solution. The solution was heated to 60°C for 2 hours where HPLC Method A indicated **indole-3-(*N,N*-dimethyl)-acetamide (6)** not detected, product 92.5%, impurity 1 2.6%, and impurity 2 1.9%. The complete reaction mixture was cooled to ambient temperature and then charged to a solution of 25% Rochelle's salts (aq) (2725 mL) dropwise over 30 minutes at 20–30°C. The resultant milky white suspension was allowed to stir at 20-25°C for 1 hour after which the layers were separated and the upper organic layer washed with saturated brine (681 mL). The organic layer was then dried over MgSO<sub>4</sub>, filtered and concentrated in vacuo at 45°C.

The resultant crude oil was subjected to an azeotrope from EtOH (545 mL x 2). This afforded the title product as an oil: yield 92% (234.6 g, 1.24 mol). <sup>1</sup>H NMR (399.78 MHz, [D<sub>1</sub>]CHCl<sub>3</sub>): δ = 8.17 (br s, 1H), 7.63 (d, *J* = 8.0 Hz, 1H), 7.36 (d, *J* = 8.0 Hz, 1H), 7.20 (t, *J* = 7.6 Hz, 1H), 7.13 (d, *J* = 7.2 Hz, 1H), 7.02 (s, 1H), 2.97 (t, *J* = 8.4 Hz, 2H), 2.67 (t, *J* = 8.4 Hz, 2H), 2.37 (s, 6H). HPLC method A: retention time = 10.66 min; peak area, 95.0%.

**3-(3-Methylbutyl)-1H-indole fumarate or *N,N*-Dimethyltryptamine fumarate (7).** To a 5 L flange flask under nitrogen was charged fumaric acid (152.7 g 1.315 mol) and *N,N*-Dimethyltryptamine (**1**) (248.2 g, 1.315 mol) as a solution in EtOH (2928 mL). The mixture was heated to 75°C to give a dark brown solution. The solution was polish filtered into a preheated (80°C) 5 L jacketed vessel. The solution was then cooled to 70°C and seeded with Pattern A (0.1 wt%), the seed was allowed to mature for 30 min before cooling to 0°C at a rate of 5°C/hour. After stirring for an additional 4 hours at 0°C, the batch was filtered and washed with cold ethanol (496 mL x 2) and then dried at 50°C overnight. This afforded the title product as a crystalline beige-coloured solid; yield 78% (312.4 g, 1.02 mol). <sup>1</sup>H NMR (399.78 MHz, [D<sub>6</sub>]DMSO): δ = 10.93 (br s, 1H), 7.58 (d, *J* = 8.0 Hz, 1H), 7.35 (d, *J* = 8.0 Hz, 1H), 7.19 (s, 1H), 7.08 (t, *J* = 8.0 Hz, 1H), 6.99 (t, *J* = 7.6 Hz, 1H), 6.54 (s, 2H), 3.02 (m, 4H), 2.63 (s, 6H). HPLC method A: retention time = 10.43 min; peak area, 100.0%

**General Procedure for the Synthesis of Compounds 9i-9vi:** To a 250 mL 3-neck flask under nitrogen was charged appropriate ratio of solid LiAlH<sub>4</sub> (1.013 g, 26.7 mmol), LiAlD<sub>4</sub> (1.120 g, 26.7 mmol) and THF (100 mL). The resultant suspension was stirred for 30 minutes before **6** (1 eq, 29.7 mmol) was charged portion-wise over 15 minutes at 20–40°C. The reaction mixture was then heated to reflux (66°C) for 2 hours where HPLC indicated no starting material **6** remained. The mixture was cooled to 0°C and quenched with 25% Rochelle's salts (aq) (120 mL) over 30

min at <30°C. The resultant milky suspension was stirred for 1 hour and then allowed to separate. The lower aqueous layer was removed and the upper organic layer washed with saturated brine (30 mL). The organics were then dried over MgSO<sub>4</sub>, filtered and concentrated in vacuo. The crude was then taken up in EtOH (52 mL) and charged with fumaric acid (2.66 g, 22.917 mmol) before heating to 75°C. The resultant solution was allowed to cool to ambient temperature overnight before further cooling to 0–5°C for 1 hour. The solids were isolated by filtration and washed with cold EtOH (6.5 mL x 2). The filter cake was dried at 50°C overnight to provide target compounds **9i-vi**. <sup>1</sup>H NMR spectra, LCMS and HPLC chromatograms for compounds **9i-vi** in Figures S-S.

**2-(1*H*-indol-3-yl)-*N,N*-dimethylethan-1-amine-1,1-*d*<sub>2</sub> fumarate (9i)**: LiAlH<sub>4</sub>:LiAlD<sub>4</sub> ratio (0:1). Solid; yield 65% (5.3 g, 17.3 mmol); <sup>1</sup>H NMR (400 MHz, [D<sub>6</sub>]DMSO): δ = 12.96 (br s, 1H), 10.97 (br s, 1H), 7.56 (br d, *J* = 7.9 Hz, 1H), 7.34 (dt, *J* = 8.1, 1.0, 1.0 Hz, 1H), 7.18 (br d, *J* = 2.4 Hz, 1H), 7.07 (ddd, *J* = 8.2, 7.0, 1.2 Hz, 1H), 6.98 (ddd, *J* = 8.0, 7.0, 1.1 Hz, 1H), 6.53 (s, 2H), 2.95 (s, 2H), 2.55 (s, 6H). HPLC method A: retention time = 10.58 min; peak area = 99.3%. HPLC-MS analysis: retention time = 10.638 min, *m/z* = 191.1, peak area = 96.6%; retention time = 10.655 min, *m/z* = 190.1, peak area = 2.7%; retention time = 10.673 min, *m/z* = 189.1, peak area = 0.7%.

**2-(1*H*-indol-3-yl)-*N,N*-dimethylethan-1-amine-1,1-*d*<sub>2</sub> fumarate (9ii)**: LiAlH<sub>4</sub>:LiAlD<sub>4</sub> ratio (1:1). Solid; yield 63% (5.7 g, 18.6 mmol); <sup>1</sup>H NMR (399.78 MHz, [D<sub>6</sub>]DMSO): δ = 10.92 (s, 1H), 7.57 (d, *J* = 7.3 Hz, 1H), 7.34 (d, *J* = 8.0 Hz, 1H), 7.19 (d, *J* = 2.5 Hz, 1H), 7.07 (td, *J* = 8.0, 0.9 Hz, 1H), 6.99 (td, *J* = 8.0, 0.9 Hz, 1H), 6.53 (s, 2H) 3.02 (m, 3H), 2.66 (m, 6H). HPLC method A: retention time = 10.60 min; peak area = 99.9%. HPLC-MS analysis: retention time = 10.650 min, *m/z* = 191.1, peak area = 21.7%; retention time = 10.660 min, *m/z* = 190.1, peak area = 48.3%; retention time = 10.678 min, *m/z* = 189.1, peak area = 30.0%.

**2-(1*H*-indol-3-yl)-*N,N*-dimethylethan-1-amine-1,1-*d*<sub>2</sub> fumarate (9iii):** LiAlH<sub>4</sub>:LiAlD<sub>4</sub> ratio (1:2). Solid; yield 52% (4.2 g, 13.7 mmol); <sup>1</sup>H NMR (399.78 MHz, [D<sub>6</sub>]DMSO):  $\delta$  = 10.89 (br s, 2H), 7.56 (d, *J* = 7.8Hz, 1H), 7.34 (d, *J* = 8.2Hz, 1H), 7.18 (d, *J* = 2.3 Hz, 1H), 7.06 (td, *J* = 8.0, 0.9 Hz, 1H), 6.99 (td, *J* = 8.0, 0.9 Hz, 1H), 6.54 (s, 2H) 3.02 (m, 3H), 2.66 (m, 6H). HPLC method A: retention time = 10.58 min; peak area = 99.9%. HPLC-MS analysis: retention time = 10.650 min; m/z = 191.1, peak area = 36.8%; retention time = 10.660 min, m/z = 190.1, peak area = 46.8%; retention time = 10.678 min, m/z = 189.1, peak area = 16.5%.

**2-(1*H*-indol-3-yl)-*N,N*-dimethylethan-1-amine-1,1-*d*<sub>2</sub> fumarate (9iv):** LiAlH<sub>4</sub>:LiAlD<sub>4</sub> ratio (1:3). Solid; yield 68% (5.4 g, 17.6 mmol); <sup>1</sup>H NMR (399.78 MHz, [D<sub>6</sub>]DMSO):  $\delta$  = 10.91 (br s, 1H), 7.56 (d, *J* = 7.8Hz, 1H), 7.34 (d, *J* = 8.2Hz, 1H), 7.19 (d, *J* = 2.3 Hz, 1H), 7.06 (td, *J* = 8.0, 0.9 Hz, 1H), 6.99 (td, *J* = 8.0, 0.9 Hz, 1H), 6.54 (s, 2H) 3.02 (s, 2.7H), 2.66 (s, 6H). HPLC method A: retention time = 10.59 min; peak area = 99.8%. HPLC-MS analysis: retention time = 10.637 min; m/z = 191.1; peak area = 49.2%; retention time = 10.649 min; m/z = 190.1; peak area = 41.5%; retention time = 10.670 min; m/z = 189.1; peak area = 9.3%.

**2-(1*H*-indol-3-yl)-*N,N*-dimethylethan-1-amine-1,1-*d*<sub>2</sub> fumarate (9v):** LiAlH<sub>4</sub>:LiAlD<sub>4</sub> ratio (0:1). Solid; yield 52% (4.2 g, 13.7 mmol); <sup>1</sup>H NMR (399.78 MHz, [D<sub>6</sub>]DMSO):  $\delta$  = 10.92 (br s, 1H), 7.59 (d, *J* = 7.8Hz, 1H), 7.35 (d, *J* = 8.2Hz, 1H), 7.20 (d, *J* = 2.3 Hz, 1H), 7.08 (td, *J* = 8.0, 0.9 Hz, 1H), 6.99 (td, *J* = 8.0, 0.9 Hz, 1H), 6.54 (s, 2H) 3.02 (s, 3.6H), 2.66 (s, 6H). HPLC method A: retention time = 10.59 min; peak area = 99.8%. HPLC-MS analysis: retention time = 10.644 min; m/z = 191.1; peak area = 11.2%; retention time = 10.651 min; m/z = 190.1; peak area = 41.3%; retention time = 10.664 min; m/z = 189.1; peak area = 47.5%.



**2-(1*H*-indol-3-yl)-*N,N*-dimethylethan-1-amine-1,1-*d*<sub>2</sub> fumarate (9vi):** LiAlH<sub>4</sub>:LiAlD<sub>4</sub> ratio (0:1). Solid; yield 62% (5.0 g, 16.3 mmol); <sup>1</sup>H NMR (399.78 MHz, [D<sub>6</sub>]DMSO): δ = 10.94 (br s, 1H), 7.59 (d, *J* = 7.8 Hz, 1H), 7.35 (d, *J* = 8.2 Hz, 1H), 7.20 (d, *J* = 2.3 Hz, 1H), 7.08 (td, *J* = 8.0, 0.9 Hz, 1H), 6.99 (td, *J* = 8.0, 0.9 Hz, 1H), 6.54 (s, 2H) 3.02 (m, 3.5H), 2.66 (s, 6H). HPLC method A: retention time = 10.58 min; peak area = 99.4%. HPLC-MS analysis: retention time = 10.633 min, *m/z* = 191.1, peak area = 7.4%; retention time = 10.640 min, *m/z* = 190.1, peak area = 35.3%; retention time = 10.654 min, *m/z* = 189.1, peak area = 57.4%.

**2-(1*H*-Indol-3-yl)-*N,N*-bis(methyl-*d*<sub>3</sub>)acetamide (10):** EDC.HCl (15.7 g, 81.90 mmol) was added to 3-indoleacetic acid **4** (12.0 g, 68.50 mmol) and HOBt.H<sub>2</sub>O (1.16 g, 75.75 mmol) in DCM (108 mL) at room temperature. The reaction was stirred for 1 hour after which DIPEA (35.6 mL, 205.75 mmol) and D<sub>6</sub>-dimethylamine HCl (9.0 g, 102.76 mmol) were added (temperature maintained below 30°C). The reaction was stirred for 1 hour at room temperature after which analysis by HPLC indicated 65.6% of **10** with 28.9% of **4** remaining. DIPEA (11.9 mL, 68.78 mmol) was added and the reaction was stirred for 1 hour at room temperature. HPLC indicated no change in conversion. Aqueous potassium carbonate (6.0 g in 54 mL water) was added and the phases were separated. The aqueous phase was extracted with DCM (2 x 30 mL). The combined organics were washed with brine (2 x 30 mL) then aqueous citric acid (20 w/w%, 50 mL), dried over MgSO<sub>4</sub> and filtered. The filtrate was stripped and the resulting solids were slurried in TBME (120 mL) and isolated by filtration. Purification by flash column chromatography yielded the title compound. Solid; yield 58% (8.34 g, 40.4 mmol). <sup>1</sup>H NMR (399.78 MHz, [D<sub>1</sub>]CHCl<sub>3</sub>): δ = 8.53 (br s, 1H), 7.65 (d, *J* = 8.0 Hz, 1H), 7.34 (d, *J* = 8.0 Hz, 1H), 7.19 (dt, *J* = 1.2, 7.6 Hz, 1H), 7.13 (dt, *J* = 1.2, 8.0 Hz, 1H), 7.02 (d, *J* = 2.4 Hz, 1H), 3.83 (s, 2H). HPLC method B: retention time = 7.04 min; peak area = 98.4%.

**2-(1H-indol-3-yl)-N,N-bis(methyl-d3)ethan-1-amine (11):** LiAlH<sub>4</sub> (1 M in THF, 17.3 mL, 17.28 mmol) was added to a suspension of **9** (4.0 g, 19.20 mmol) in THF (10 mL) at <30°C. The resulting reaction was heated to 60–65°C and stirred for 2 hours. HPLC analysis indicated complete consumption of **9**. The reaction was cooled to room temperature and quenched into aqueous Rochelle's salts (10 g in 30 mL water) at <30°C. After stirring for 1 hour, the phases were separated. The aqueous was extracted with THF (20 mL). The combined organics were washed with brine (20 mL), dried over MgSO<sub>4</sub>, filtered and stripped (azeotroped with ethanol, 20 mL) to afford **10**. <sup>1</sup>H NMR confirmed the identity of the title compound **11** and indicated 8.5% ethanol was present (no THF). Oil; yield 97% (3.63 g, 18.7 mmol). <sup>1</sup>H NMR (399.79 MHz, [D<sub>1</sub>]CHCl<sub>3</sub>): δ = 8.08 (br s, 1H), 7.63 (d, *J* = 8.0 Hz, 1H), 7.36 (d, *J* = 8.0 Hz, 1H), 7.20 (dt, *J* = 1.2, 8.0 Hz, 1H), 7.13 (t, *J* = 7.6 Hz, 1H), 7.03 (d, *J* = 1.6 Hz, 1H), 2.97 (t, *J* = 8.4 Hz, 2H), 2.66 (t, *J* = 8.0 Hz, 2H). HPLC method B: retention time = 2.55 min; peak area = 99.86%.

**2-(1H-indol-3-yl)-N,N-bis(methyl-d3)ethan-1-amine fumarate (12):** **11** (3.6 g active, 18.53 mmol) was dissolved in ethanol (43 mL) at room temperature. Fumaric acid (2.15 g, 18.53 mmol) was added and the solution was heated to 75°C (solids crystallized during heating and did not re-dissolve). The resulting suspension was cooled to 0–5°C and stirred for 1 hour. The solids were isolated by filtration, washed with ethanol (2 x 7 mL) and pulled dry. Further drying in a vacuum oven at 50°C yielded the desired title compound **12**. Solid; yield 87% (4.98 g, 16.6 mmol). <sup>1</sup>H NMR (400 MHz, [D<sub>6</sub>]DMSO): δ = 10.93 (br s, 1H), 7.58 (d, *J* = 7.6 Hz, 1H), 7.35 (d, *J* = 8.4 Hz, 1H), 7.19 (d, *J* = 1.6 Hz, 1H), 7.08 (dt, *J* = 1.2, 8.0 Hz, 1H), 6.99 (dt, *J* = 1.2, 8.0 Hz, 1H), 6.53 (s, 2H), 3.03 (m, 4H). HPLC method A: retention time = 10.29 min; peak area = 99.9%. HPLC-MS analysis: retention time = 10.307 min, *m/z* = 195.2, peak area = 98.9%; retention time = 10.316 min, *m/z* = 194.2, peak area = 1.0%; retention time = 10.322 min, *m/z* = 193.2, peak area = <0.01%.

**2-(1H-Indol-3-yl)-N,N-bis(methyl-d<sub>3</sub>)ethan-1-amine-1,1-d<sub>2</sub> (13):** LiAlD<sub>4</sub> (1 M in THF, 17.3 mL, 17.28 mmol) was added to a suspension of **10** (4.0 g, 19.20 mmol) in THF (10 mL) at <30°C. The resulting reaction was heated to 60–65°C and stirred for 2 hours. HPLC analysis indicated complete consumption of **9**. The reaction was cooled to room temperature and quenched into aqueous Rochelle's salts (10 g in 30 mL water) at <30°C. After stirring for 1 hour, the phases were separated. The aqueous was extracted with THF (20 mL). The combined organics were washed with brine (20 mL), dried over MgSO<sub>4</sub>, filtered and stripped (azeotroped with ethanol, 20 mL) to give the title compound **13**. Amber oil (4.01 g). <sup>1</sup>H NMR confirmed the identity of the product and indicated 8.6% ethanol was present (no THF). <sup>1</sup>H NMR (399.78 MHz, [D<sub>1</sub>]CHCl<sub>3</sub>): δ = 8.12 (br s, 1H), 7.63 (d, *J* = 8.0 Hz, 1H), 7.36 (d, *J* = 8.0 Hz, 1H), 7.20 (dt, *J* = 1.2, 8.0 Hz, 1H), 7.13 (dt, *J* = 1.2, 8.0 Hz, 1H), 7.02 (d, *J* = 1.6 Hz, 1H), 2.95 (s, 2H). HPLC method B: retention time = 2.55 min; peak area = 91.4%.

**2-(1H-Indol-3-yl)-N,N-bis(methyl-d<sub>3</sub>)ethan-1-amine-1,1-d<sub>2</sub> fumarate (14):** **13** (3.6 g active, 18.53 mmol) was dissolved in ethanol (43 mL) at room temperature. Fumaric acid (2.15 g, 18.53 mmol) was added and the solution was heated to 75°C (solids crystallized during heating and did not re-dissolve). The resulting suspension was cooled to 0–5°C and stirred for 1 hour. The solids were isolated by filtration, washed with ethanol (2 x 7 mL) and pulled dry. Further drying in a vacuum oven at 50°C yielded the title compound **14**. Solid: 81%, (4.62 g, 14.8 mmol). <sup>1</sup>H NMR (399.78 MHz, [D<sub>6</sub>]DMSO): δ = <sup>1</sup>H NMR (400 MHz, [D<sub>6</sub>]DMSO): δ = 10.93 (br s, 1H), 7.58 (d, *J* = 7.6 Hz, 1H), 7.35 (d, *J* = 8.0 Hz, 1H), 7.19 (d, *J* = 2.4 Hz, 1H), 7.08 (dt, *J* = 1.2, 8.0 Hz, 1H), 6.99 (dt, *J* = 1.2, 8.0 Hz, 1H), 6.53 (s, 2H), 3.00 (s, 2H). HPLC method A: retention time = 10.29 min; peak area = 99.9%. HPLC-MS analysis: retention time = 10.302 min, *m/z* = 197.2, peak area = 96.6%; retention time = 10.317 min, *m/z* = 196.2, peak area = 3.3%; retention time = 10.342 min, *m/z* = 195.2, peak area = 0.1%.

## **S2. *In Vitro* Studies, Experimental Information**

*In vitro* studies investigating metabolic stability and physicochemical properties were performed by Sygnature Discovery Ltd (Nottingham, UK).

Receptor affinities were determined at Eurofins Panlabs Discovery Services, Taiwan, Ltd. (Taipei, Taiwan).

*In vitro* intrinsic clearance in whole hepatocytes and mitochondrial fractions of hepatocytes were used to screen all 8 deuterated DMT molecules.

Human hepatocytes from 10 donors (male and female) were thawed in a water bath at 37°C and decanted into hepatocyte buffer solution (26.2 mM NaHCO<sub>3</sub>, 9 mM HEPES, 2.2 mM D-fructose, Dulbecco's Modified Eagle Medium, in MilliQ purified water), which was centrifuged, the supernatant removed and resuspended in hepatocyte buffer solution at the final assay concentration (nominal 0.5 million cells/mL). 7 and deuterated DMT compounds, together with positive control stocks (diltiazem [CYP3A4 metabolism] and diclofenac [CYP2C9, CYP3A4 and glucuronidation metabolism]), were prepared at 10 mM in DMSO and diluted to 100 x the assay concentration in 9:1 acetonitrile:DMSO.

Hepatocytes were added to pre-warmed incubation tubes (37°C) together with compound stock solution (at 3.1 µM freebase; 5 µM fumarate), 0.9% (v/v) acetonitrile and 0.1% (v/v) DMSO to achieve a final count of 0.362 million viable cells/mL, shaken orbitally through the experiment. Aliquots were taken from the incubation tubes at 4, 8, 15, 30, 45, and 60 min and quenched 1:4 with ice-cold acidified methanol or acetonitrile-containing internal standard, before protein precipitation at -12 °C for a minimum of 12 hours before centrifugation at 4°C. Supernatants were transferred to 96-well plates for ultra-high-performance liquid chromatography-tandem mass spectrometry (LC-MS/MS) analysis.

MS peak areas were used to generate ln (MS response) vs time plots. Subsequent intrinsic clearance ( $\mu\text{L}/\text{min}/\text{million cells}$ ) and half-life ( $t_{1/2}$ , min) values were calculated using the following equations:

$$\text{Half Life} = \frac{\ln(2)}{k}$$

$$\text{Intrinsic clearance} = \frac{-1000k}{\text{cell density} \left( \frac{\text{millions}}{\text{mL}} \right)}$$

$k = \text{slope of ln (MS peak response or area) vs. plot}$

Human liver mitochondrial fractions (XenoTech, Sekisui, mixed gender, 5-donor pool) were assayed using a similar methodology to the human hepatocyte experiments, with a final substrate concentration of  $0.6 \mu\text{M}$  ( $1 \mu\text{M}$  fumarate) and liver mitochondrial concentration of  $0.5 \text{ mg/mL}$ .

Statistical analysis was performed using IBM SPSS Statistics v28.0. A simple linear regression was run to assess the effect of deuteration on half-life and clearance. Half-life and clearance in **9i** and **7** were compared using an independent two-sample t-test. Statistical significance was assumed at the 5% level.

Blood/plasma ratio was determined using fresh human blood and plasma samples from a donor panel aliquoted and pre-incubated at 37 °C for 5 min. **9i** (0.6 µM freebase; 1 µM fumarate), **7** (0.6 µM freebase; 1 µM fumarate), diclofenac (positive control, 5 µM) and verapamil (positive control, 5 µM) were prepared at 2 mM in DMSO, while chloroquine (positive control, 5 µM) was prepared at 2 mM in water, before all were further diluted to 100 x the final assay concentration in methanol.

Stocks of **9i**, **7** and controls were separately spiked 1:100 into the blood and plasma samples, which were incubated at 37 °C for 30 min, with shaking for 15 sec at 15 and 30 min. After 30 min plasma samples were quenched 1:3 into ice-cold methanol-containing internal standard; blood samples were centrifuged, an aliquot of the plasma was taken and supernatant quenched 1:3 into ice-cold methanol-containing internal standard, before protein precipitation between the matrix-matched plasma samples at -12 °C for a minimum of 12 hours before centrifugation at 4 °C. Supernatants were transferred to 96-well plates for LC-MS/MS analysis.

Plasma protein binding was assayed using thawed pooled donor plasma, which was centrifuged, and the resulting supernatant decanted into a fresh vessel, with pH adjusted to 7.4 using lactic acid or NaOH. Stocks of **9i** and **7** were prepared at 10 mM in DMSO and further diluted to 100 x the assay concentration, which were then spiked 1:100 into the plasma samples to achieve a final concentration of 3.2 µM (5 µM fumarate), except for **7** and **9i** which were prepared at 1 µM (1.6 µM fumarate) due to a technical error.

For each sample, 200 µL of the spiked plasma was added to the red compartment of a Rapid Equilibrium Dialysis (RED) plate (Thermo Fisher Scientific, UK) with 350 µL phosphate-buffered saline (PBS) added to the buffer compartment before sealing the RED plate with a breathable

lid and shaking on an orbital shaker in a 37 °C incubator at 5% CO<sub>2</sub> for 4 hours. A sample of the plasma/drug was taken and mixed with an equal volume of PBS, and a sample was taken from the buffer side and mixed with an equal volume of blank plasma before quenching 1:3 with ice-cold acetonitrile-containing internal standard. The matrix-matched quenched samples were mixed before protein precipitation at –12 °C for a minimum of 12 hours before centrifugation at 4 °C.

Supernatants were transferred to 96-well plates for LC-MS/MS analysis; values were derived for fraction of unbound and bound drug, together with recovery, following the preparation of matrix-matched standard curve and quality control samples to allow for quantification of the concentration in each sample.

The distribution coefficient  $\log D_{7.4}$  measures the partition of substances in octanol and aqueous solutions in a solution at pH 7.4, i.e., approximating that of blood. A 10 mM stock of **9i** and **7** diluted in DMSO were prepared together with 10 mM control markers (ketoconazole, propranolol and verapamil). These were added to incubation tubes together with octanol before shaking for 5 min; buffer was added, and the tubes were shaken for a further 90 min at room temperature. The tubes were then centrifuged at room temperature and samples taken from both octanol and buffer fractions, which were diluted to give similar responses on LC-MS/MS before being transferred to 96-well plates with methanol-containing internal standard prior to LC-MS/MS analysis.

Competitive binding of **9i** and **7** against specific radiolabelled probes was assessed at a fixed concentration of 6 μM (10 μM fumarate) using a standard panel of receptors, transporters, ion channels and enzymes, including those of particular interest (details in Tables S2 and S3). The

receptor/ion channel screening panel consisted of 92 receptors, including the Safety Screen 87 Panel, 5-HT<sub>7</sub>, 5-HT<sub>6</sub>, 5-HT<sub>5A</sub>,  $\alpha_{2C}$  and  $\sigma_1$  receptors. The 5-HT<sub>2D</sub>, mGluR<sub>2</sub> and imidazoline I<sub>2</sub> receptor were not tested as they were not available at the time of assay. *In vitro* inhibition of several enzymes by **9i** and **7** was assessed, including MAO-A and MAO-B, sodium/potassium ATPase, acetylcholinesterase, cyclo-oxygenase (COX-1 and COX-2), angiotensin converting enzyme (ACE), cathepsin G, phosphodiesterases (3A and 4D2), serine/threonine protein kinase PKC $\alpha$ , insulin receptor protein kinase and lymphocyte-specific protein tyrosine kinase (Supplementary Table 2). Effects of **9i** and **7** on enzyme activity were measured using spectrophotometric quantitation.

IC<sub>50</sub>/K<sub>i</sub> values were subsequently determined for **9i** and **7** only where radioligand binding was inhibited by >50% at a concentration of 10  $\mu$ M. Freebase concentrations of **9i** and **7** used for IC<sub>50</sub>/K<sub>i</sub> determination were 0.003, 0.01, 0.03, 0.1, 0.3, 1, 3, and 10  $\mu$ M. Mean values were calculated from two separate assays. IC<sub>50</sub> and Hill coefficient (nH) values were determined by a non-linear, least squares regression analysis using MathIQ™ (ID Business Solutions Ltd., UK). K<sub>i</sub> values were calculated by applying the Cheng and Prusoff equation<sup>1</sup> of the observed IC<sub>50</sub> for the test compound, the assay radioligand concentration and historical K<sub>D</sub> values of the ligand (obtained experimentally at Eurofins Panlabs, Inc.). nH defines the slope of the competitive binding curve where values significantly different than 1.0, may suggest that the binding displacement does not follow the laws of mass action with a single binding site.



S3. <sup>1</sup>H-NMR data for test compounds 7, 9i-9vi, 12 and 14.

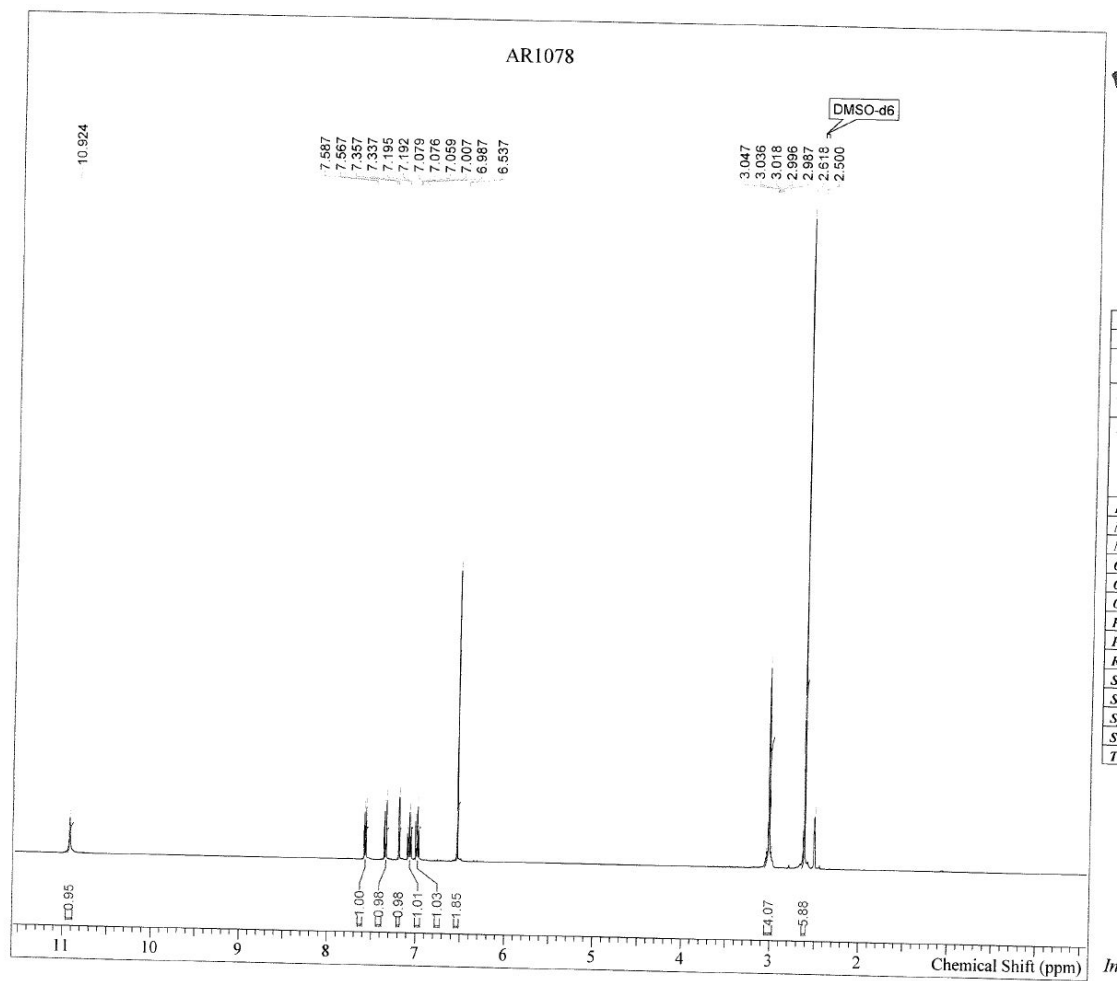

# Compound example 7

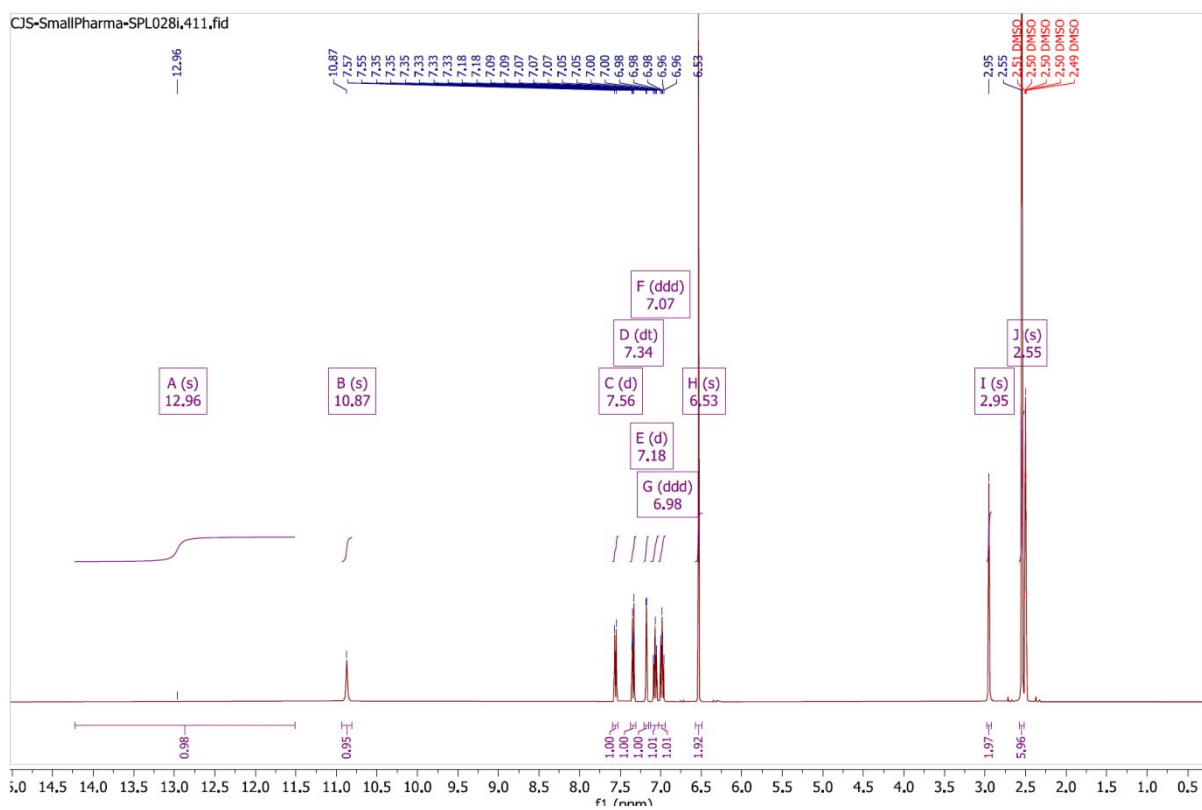

Compound example **9i**

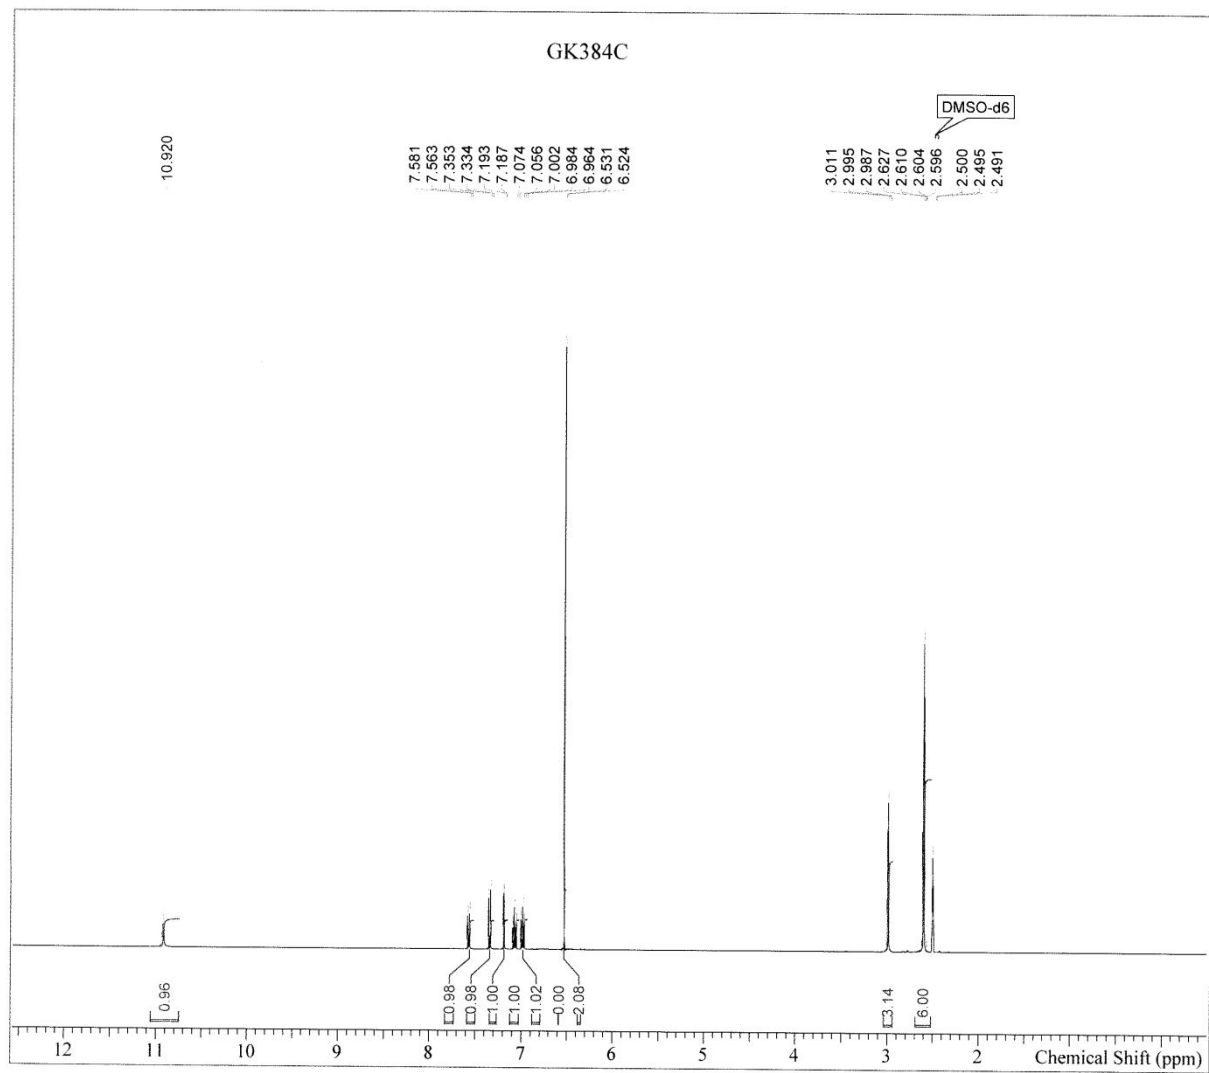

Compound example **9ii**

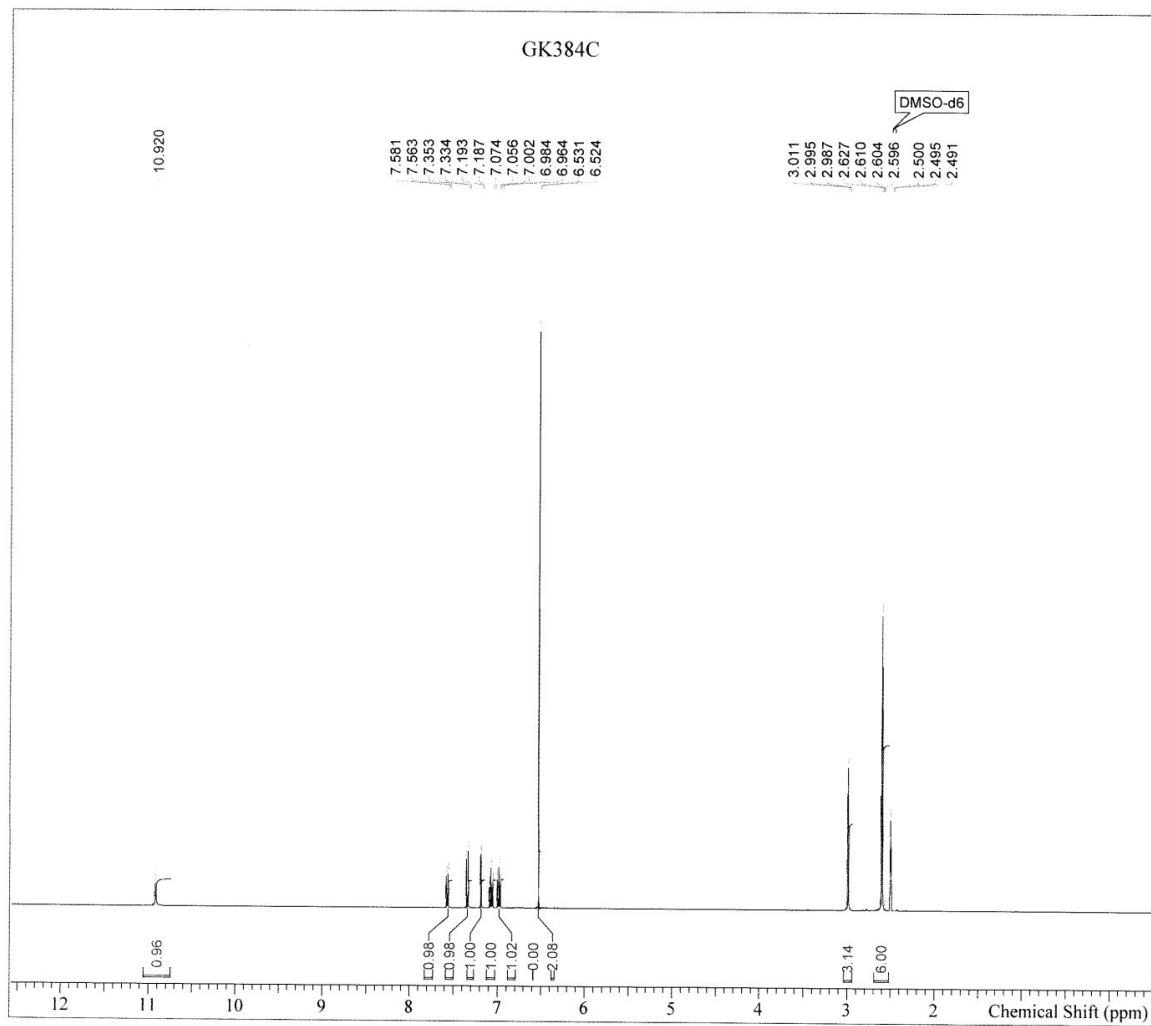

Compound example **9iii**

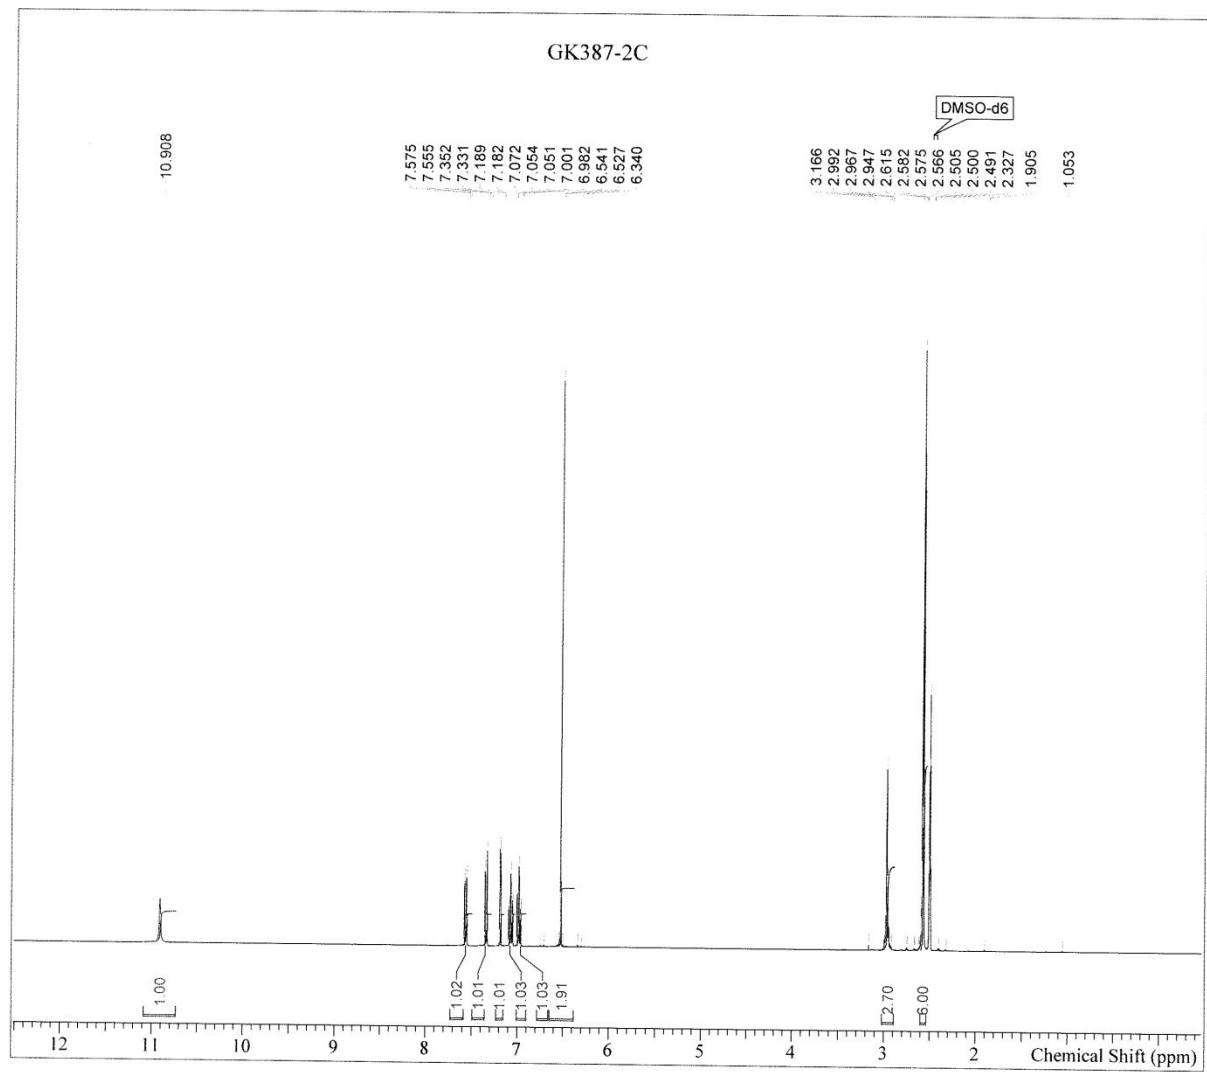

Compound example **9iv**

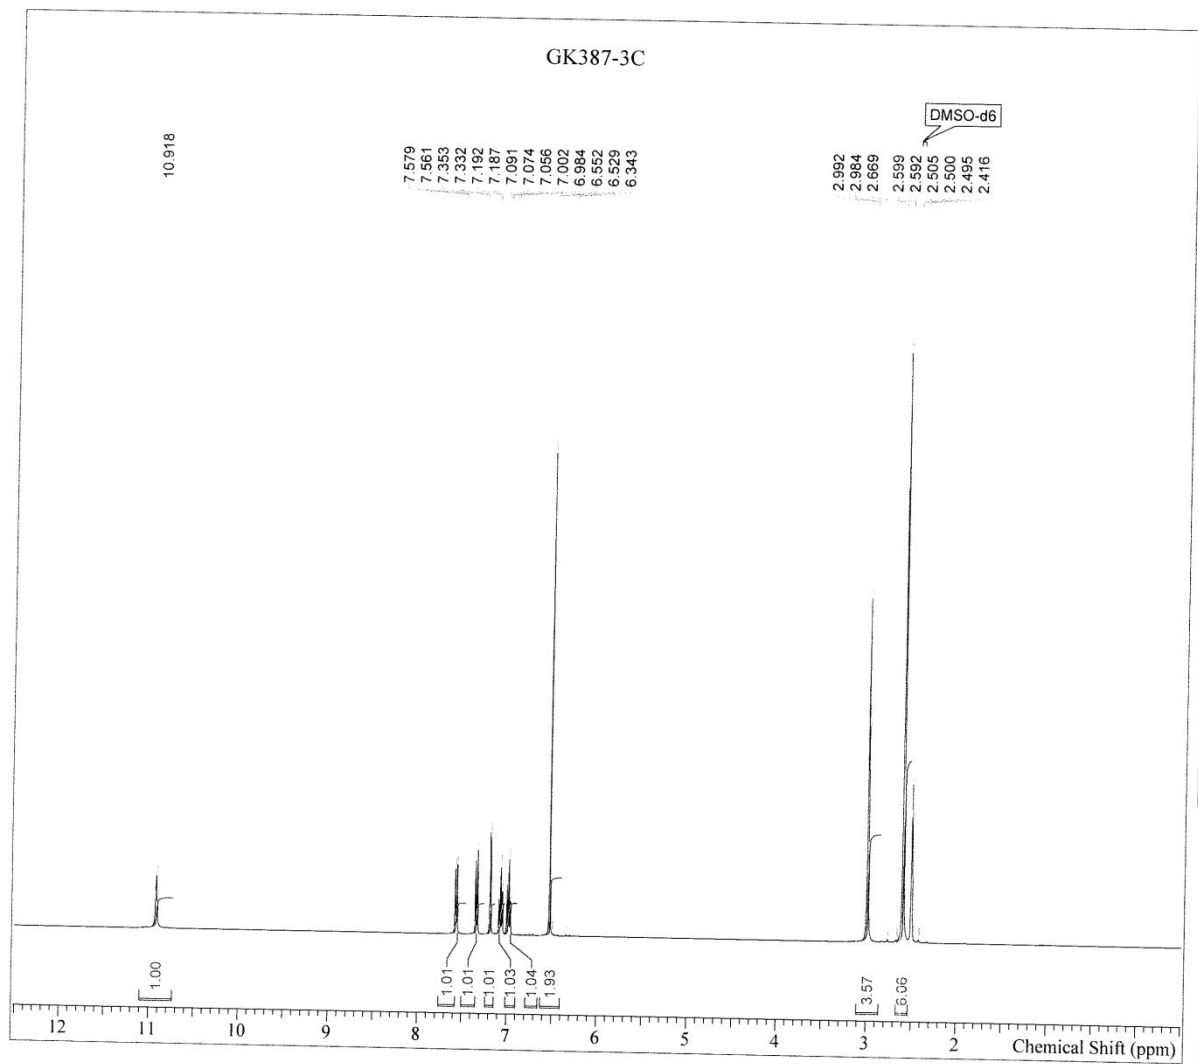

Compound example 9v

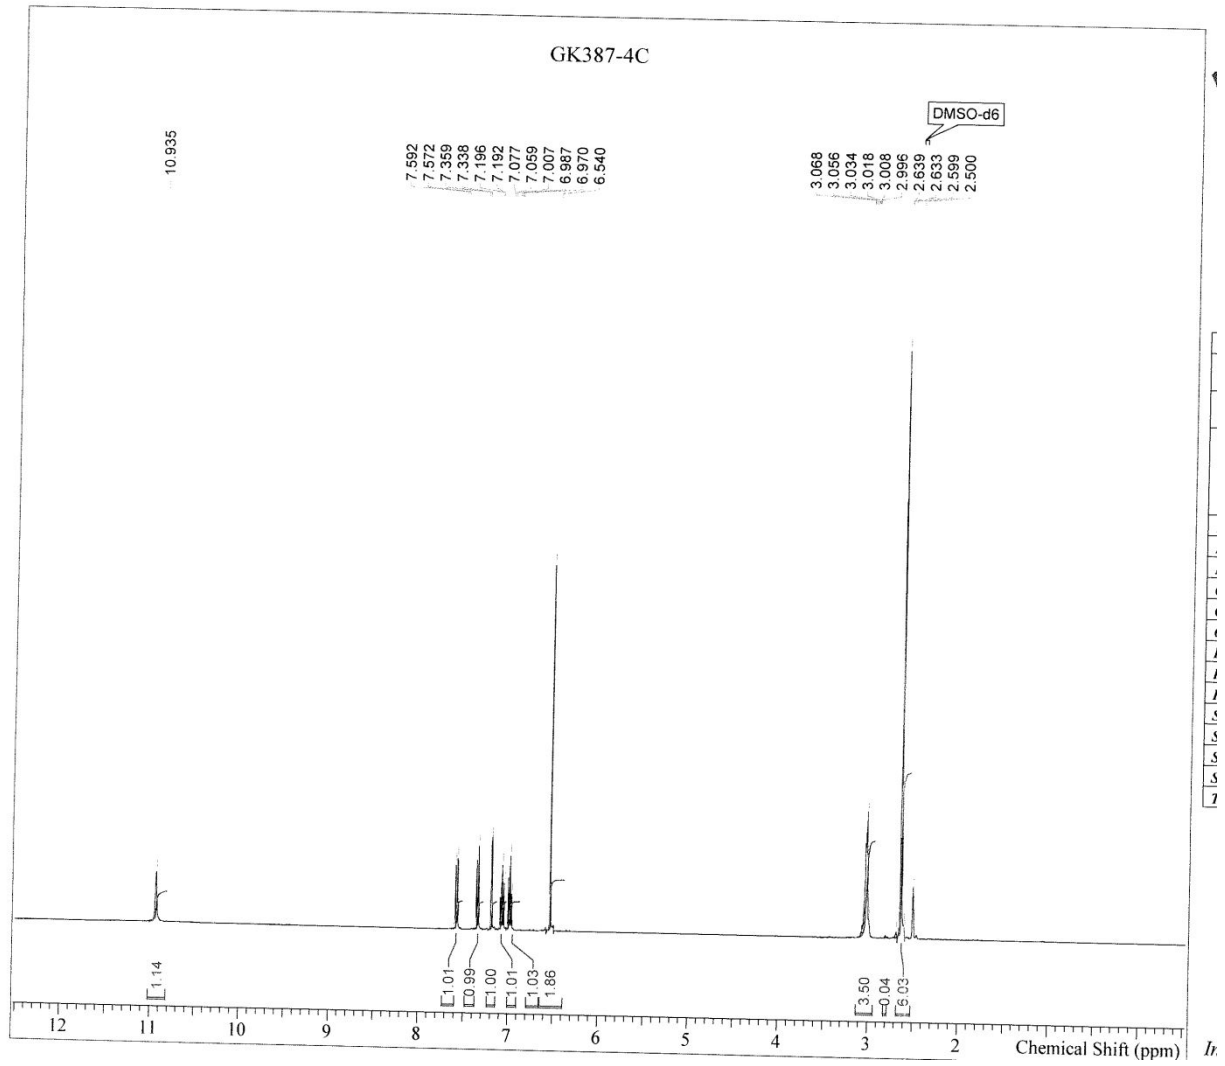

Compound example **9vi**



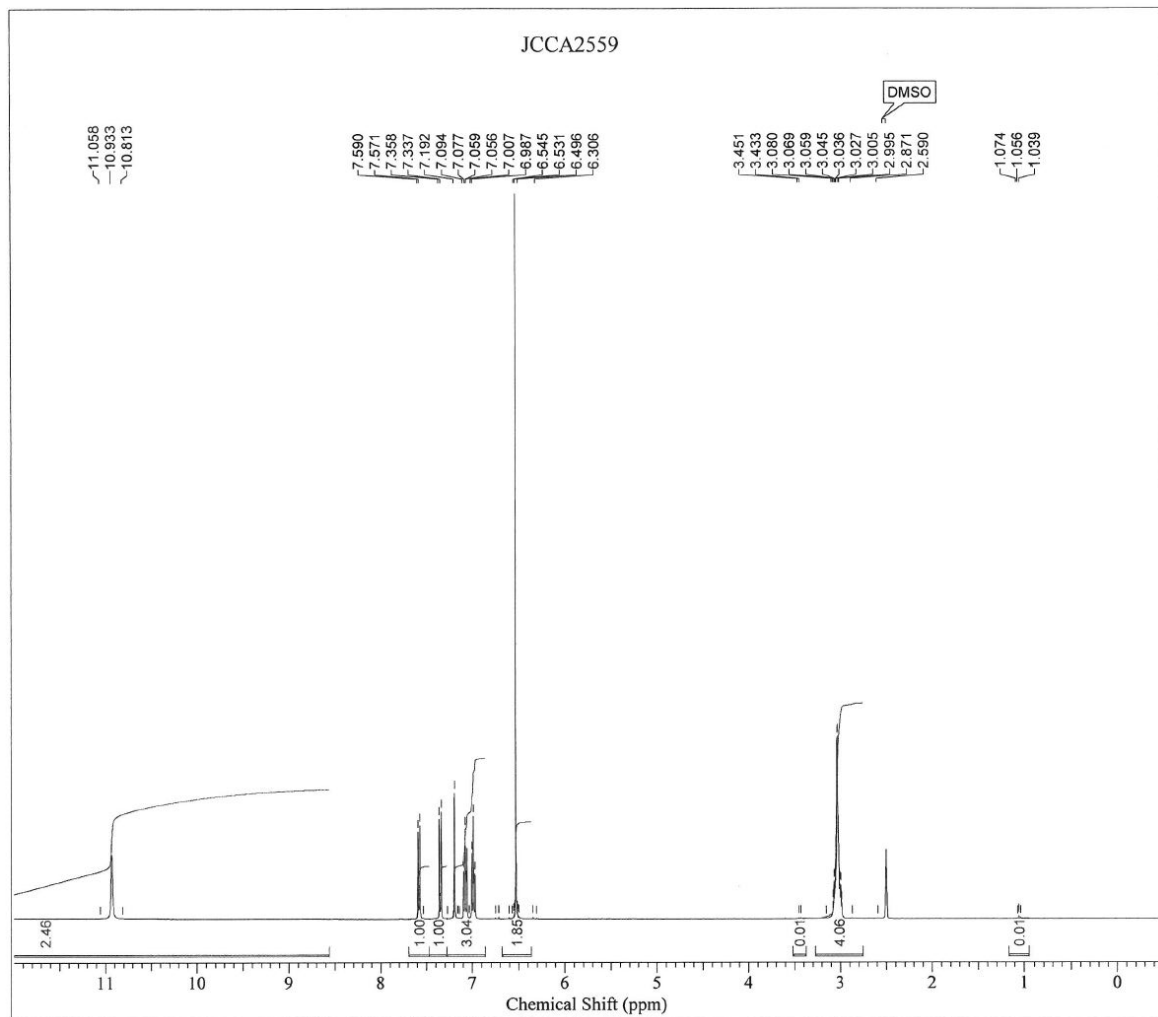

Compound example 12

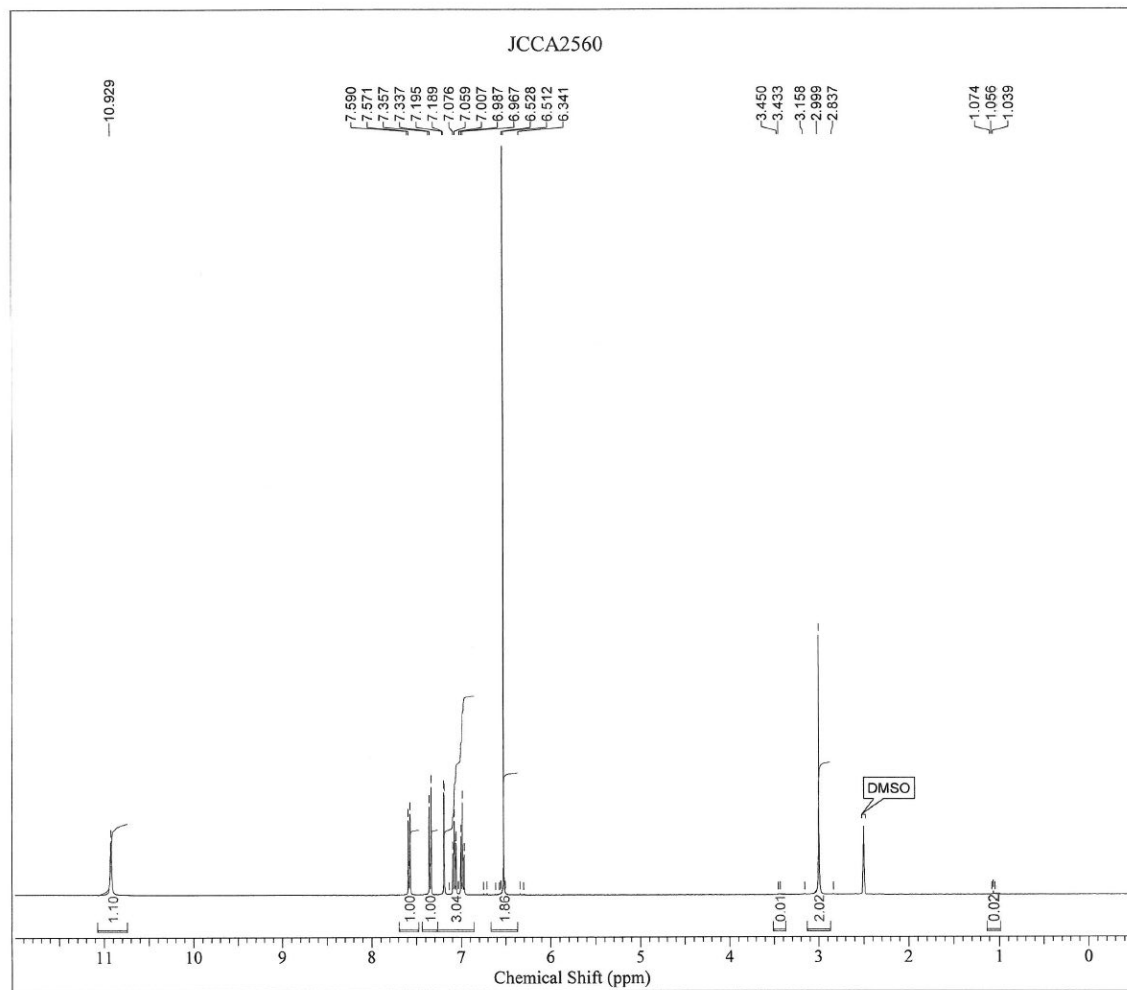

Compound example 14

S4. HPLC data for test compounds 7, 9i-9vi, 12 and 14.

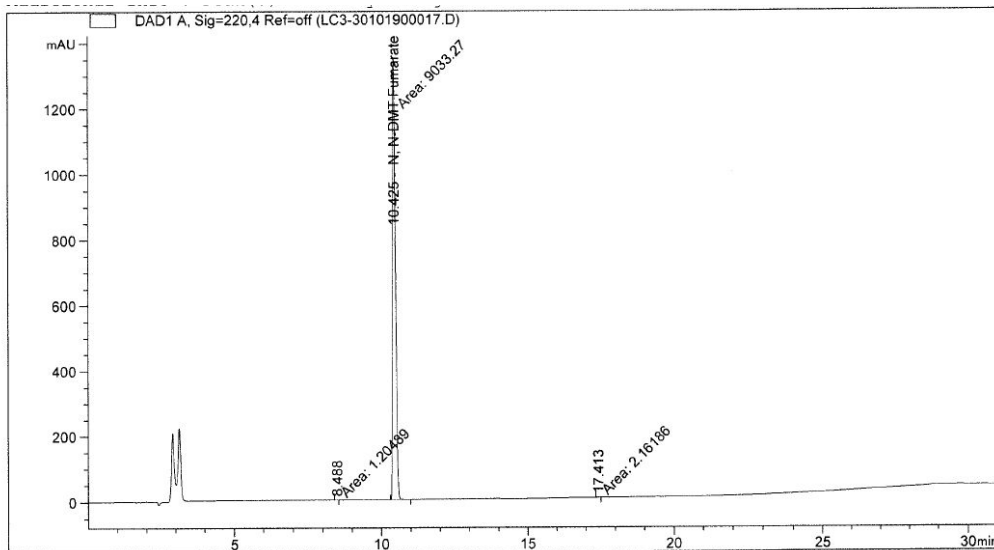

Signal 1: DAD1 A, Sig=220,4 Ref=off

| Peak # | RetTime [min] | Type | Width [min] | Area [mAU*s] | Height [mAU] | Area %  |
|--------|---------------|------|-------------|--------------|--------------|---------|
| 1      | 9.741         | MM   | 0.0742      | 3.88420      | 8.72299e-1   | 0.0482  |
| 2      | 10.291        | MM   | 0.1138      | 8049.75830   | 1178.90552   | 99.8572 |
| 3      | 11.460        | MM   | 0.0933      | 1.67731      | 2.99644e-1   | 0.0208  |
| 4      | 12.309        | MM   | 0.2037      | 5.94807      | 4.86751e-1   | 0.0738  |

Totals : 8061.26788 1180.56421

Compound example 7

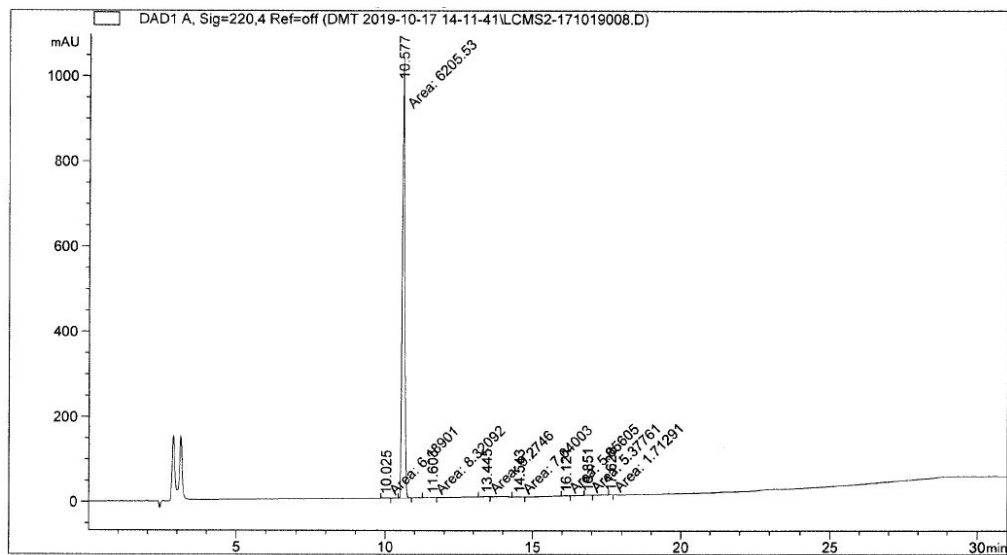

=====  
 Area Percent Report  
 =====

Sorted By : Signal  
 Multiplier : 1.0000  
 Dilution : 1.0000  
 Do not use Multiplier & Dilution Factor with ISTDs

Signal 1: DAD1 A, Sig=220,4 Ref=off

| Peak # | RetTime [min] | Type | Width [min] | Area [mAU*s] | Height [mAU] | Area %  |
|--------|---------------|------|-------------|--------------|--------------|---------|
| 1      | 10.025        | MM   | 0.1932      | 6.18901      | 5.34007e-1   | 0.0990  |
| 2      | 10.577        | MM   | 0.0997      | 6205.53418   | 1037.36975   | 99.3028 |
| 3      | 11.603        | MM   | 0.3375      | 8.32092      | 4.10872e-1   | 0.1332  |

Compound example **9i** (SPL028i GSK387-5C)

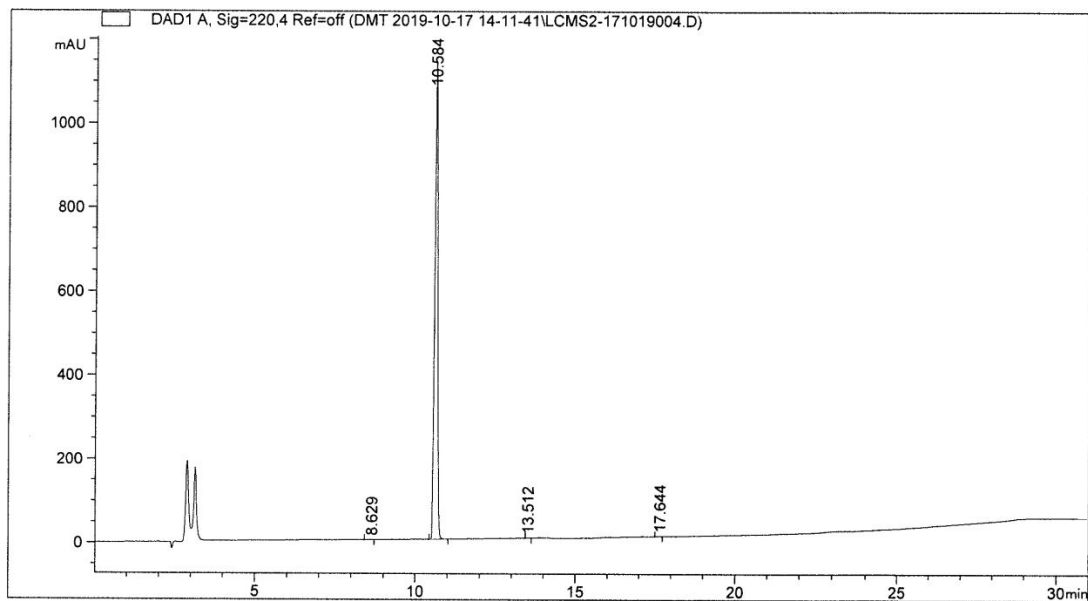

=====  
 Area Percent Report  
 =====

Sorted By : Signal  
 Multiplier : 1.0000  
 Dilution : 1.0000  
 Do not use Multiplier & Dilution Factor with ISTDs

Signal 1: DAD1 A, Sig=220,4 Ref=off

| Peak # | RetTime [min] | Type | Width [min] | Area [mAU*s] | Height [mAU] | Area %  |
|--------|---------------|------|-------------|--------------|--------------|---------|
| 1      | 8.629         | MM   | 0.1301      | 2.96942      | 3.80264e-1   | 0.0406  |
| 2      | 10.584        | MM   | 0.1066      | 7295.20459   | 1140.14697   | 99.8607 |
| 3      | 13.512        | MM   | 0.1110      | 2.72276      | 4.08686e-1   | 0.0373  |

Compound example **9ii** (SPL028ii GK384C)

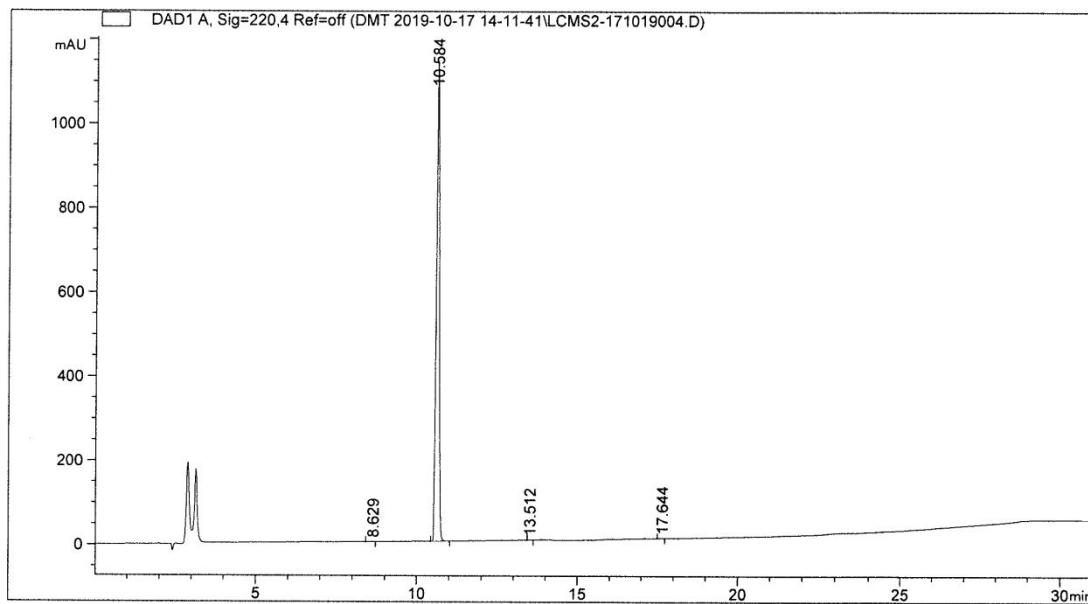

=====  
 Area Percent Report  
 =====

Sorted By : Signal  
 Multiplier : 1.0000  
 Dilution : 1.0000  
 Do not use Multiplier & Dilution Factor with ISTDs

Signal 1: DAD1 A, Sig=220,4 Ref=off

| Peak # | RetTime [min] | Type | Width [min] | Area [mAU*s] | Height [mAU] | Area %  |
|--------|---------------|------|-------------|--------------|--------------|---------|
| 1      | 8.629         | MM   | 0.1301      | 2.96942      | 3.80264e-1   | 0.0406  |
| 2      | 10.584        | MM   | 0.1066      | 7295.20459   | 1140.14697   | 99.8607 |
| 3      | 13.512        | MM   | 0.1110      | 2.72276      | 4.08686e-1   | 0.0373  |

Compound example **9iii** (SPL028iii GK387-1C)

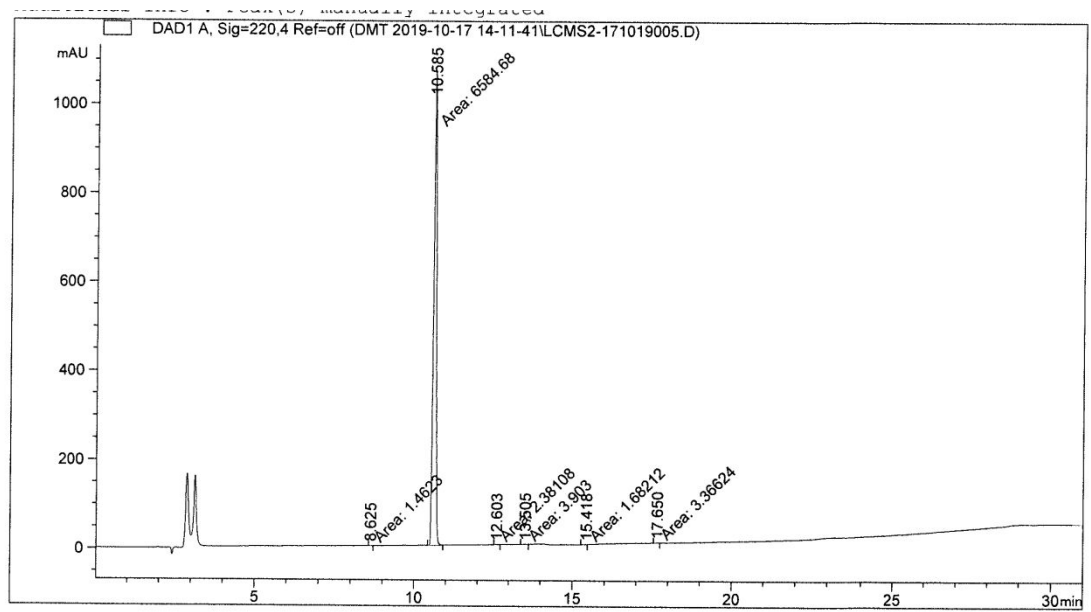

=====  
 Area Percent Report  
 =====

Sorted By : Signal  
 Multiplier : 1.0000  
 Dilution : 1.0000  
 Do not use Multiplier & Dilution Factor with ISTDs

Signal 1: DAD1 A, Sig=220,4 Ref=off

| Peak # | RetTime [min] | Type | Width [min] | Area [mAU*s] | Height [mAU] | Area %  |
|--------|---------------|------|-------------|--------------|--------------|---------|
| 1      | 8.625         | MM   | 0.0761      | 1.46230      | 3.20251e-1   | 0.0222  |
| 2      | 10.585        | MM   | 0.1025      | 6584.67969   | 1070.60669   | 99.8061 |
| 3      | 12.603        | MM   | 0.1202      | 2.38108      | 3.30208e-1   | 0.0361  |

Compound example **9iv** (SPL028iv GK387-2C)

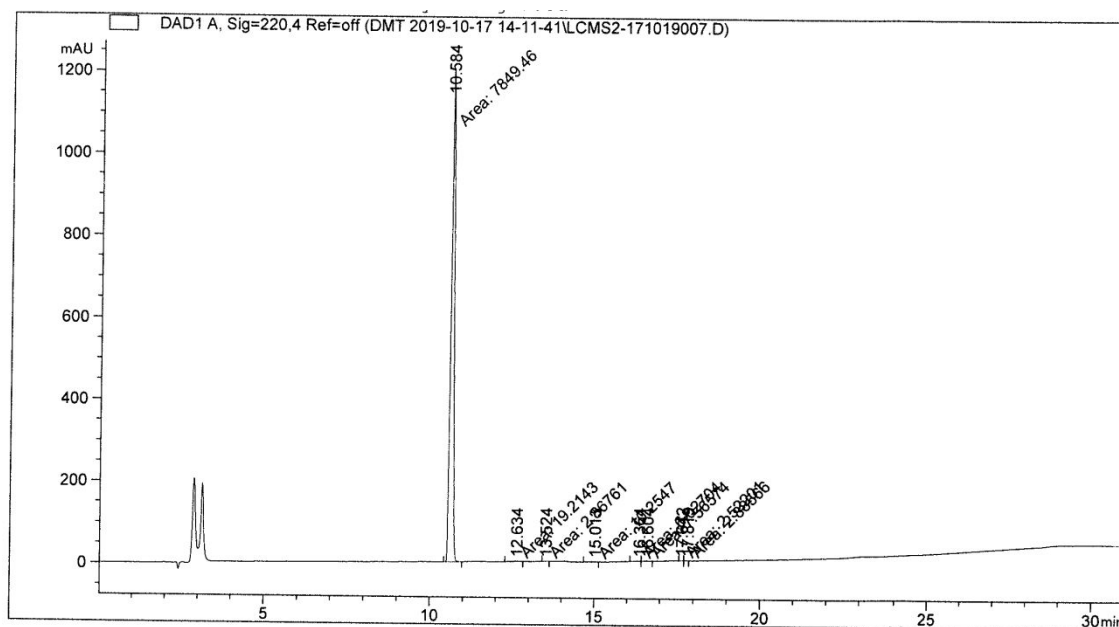

=====  
 Area Percent Report  
 =====

Sorted By : Signal  
 Multiplier : 1.0000  
 Dilution : 1.0000  
 Do not use Multiplier & Dilution Factor with ISTDs

Signal 1: DAD1 A, Sig=220,4 Ref=off

| Peak # | RetTime [min] | Type | Width [min] | Area [mAU*s] | Height [mAU] | Area %  |
|--------|---------------|------|-------------|--------------|--------------|---------|
| 1      | 10.584        | MM   | 0.1084      | 7849.46289   | 1206.84558   | 99.3502 |
| 2      | 12.634        | MM   | 0.2874      | 19.21431     | 1.11412      | 0.2432  |
| 3      | 13.524        | MM   | 0.0899      | 2.86761      | 5.31860e-1   | 0.0363  |

Compound example **9v** (SPL028v GK387-3C)



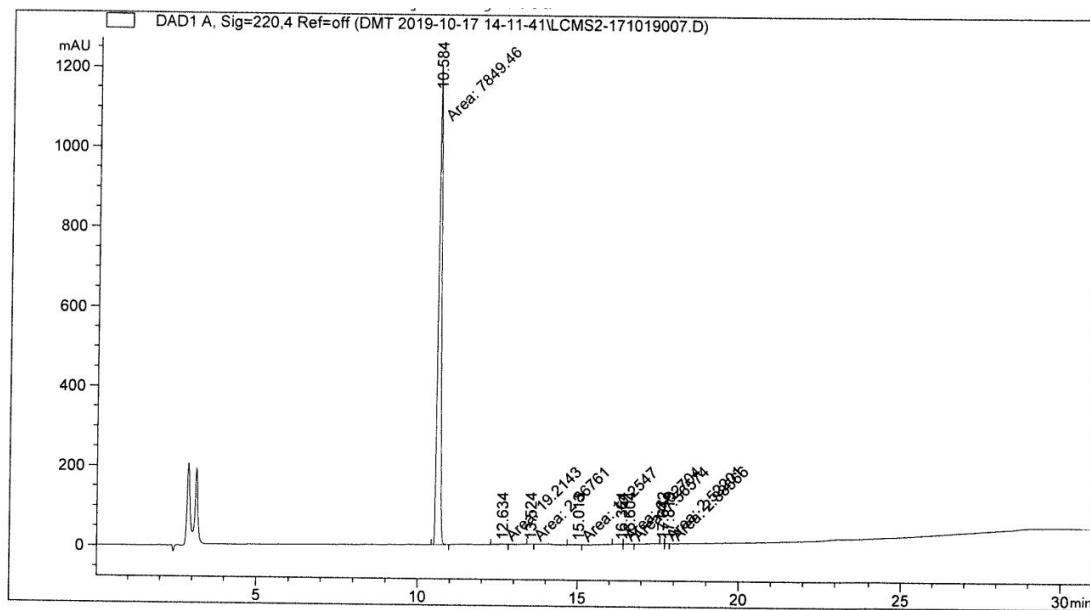

=====  
 Area Percent Report  
 =====

Sorted By : Signal  
 Multiplier : 1.0000  
 Dilution : 1.0000  
 Do not use Multiplier & Dilution Factor with ISTDs

Signal 1: DAD1 A, Sig=220,4 Ref=off

| Peak # | RetTime [min] | Type | Width [min] | Area [mAU*s] | Height [mAU] | Area %  |
|--------|---------------|------|-------------|--------------|--------------|---------|
| 1      | 10.584        | MM   | 0.1084      | 7849.46289   | 1206.84558   | 99.3502 |
| 2      | 12.634        | MM   | 0.2874      | 19.21431     | 1.11412      | 0.2432  |
| 3      | 13.524        | MM   | 0.0899      | 2.86761      | 5.31860e-1   | 0.0363  |

Compound example **9vi** (SPL028vi GK387-4C)

Additional Info : Peak(s) manually integrated

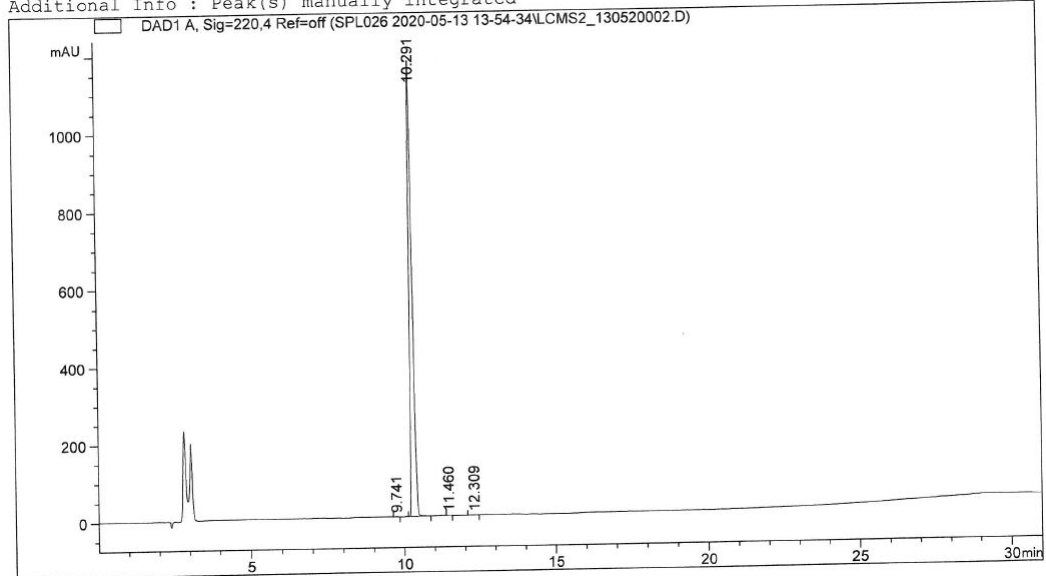

Signal 1: DAD1 A, Sig=220,4 Ref=off

| Peak # | RetTime [min] | Type | Width [min] | Area [mAU*s] | Height [mAU] | Area %  |
|--------|---------------|------|-------------|--------------|--------------|---------|
| 1      | 9.741         | MM   | 0.0742      | 3.88420      | 8.72299e-1   | 0.0482  |
| 2      | 10.291        | MM   | 0.1138      | 8049.75830   | 1178.90552   | 99.8572 |
| 3      | 11.460        | MM   | 0.0933      | 1.67731      | 2.99644e-1   | 0.0208  |
| 4      | 12.309        | MM   | 0.2037      | 5.94807      | 4.86751e-1   | 0.0738  |

Totals : 8061.26788 1180.56421

Compound example **12** (JCCA2559)

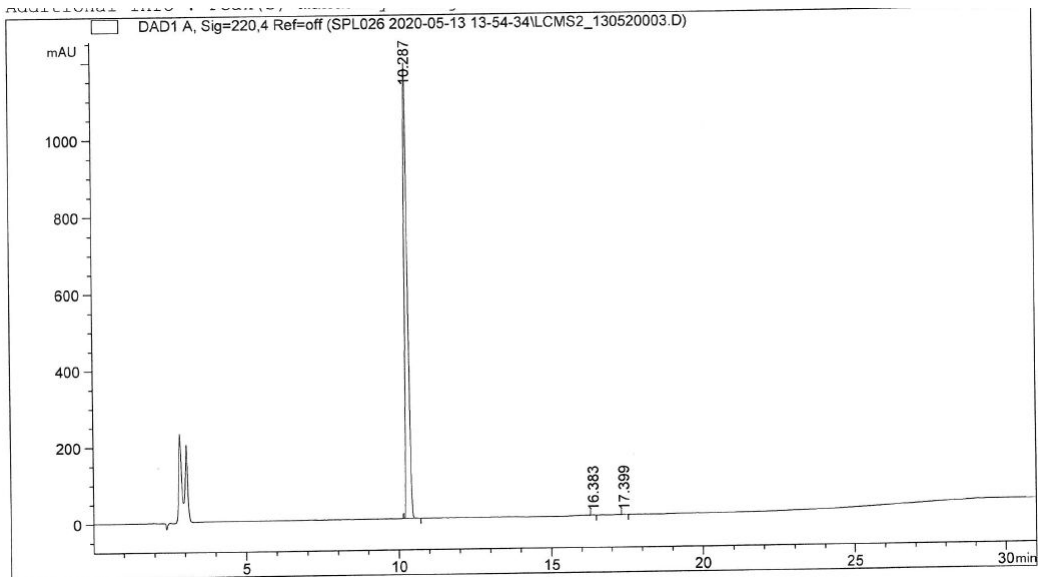

Signal 1: DAD1 A, Sig=220,4 Ref=off

| Peak # | RetTime [min] | Type | Width [min] | Area [mAU*s] | Height [mAU] | Area %  |
|--------|---------------|------|-------------|--------------|--------------|---------|
| 1      | 9.741         | MM   | 0.0742      | 3.88420      | 8.72299e-1   | 0.0482  |
| 2      | 10.291        | MM   | 0.1138      | 8049.75830   | 1178.90552   | 99.8572 |
| 3      | 11.460        | MM   | 0.0933      | 1.67731      | 2.99644e-1   | 0.0208  |
| 4      | 12.309        | MM   | 0.2037      | 5.94807      | 4.86751e-1   | 0.0738  |

Totals : 8061.26788 1180.56421

Compound example **14** JCCA2560

**S5. Table S1: Mean In Vitro Percent Inhibition with 10  $\mu$ M 9i**

|                                     | 9i |
|-------------------------------------|----|
| Adenosine A <sub>1</sub> (human)    | -3 |
| Adenosine A <sub>2A</sub> (human)   | 8  |
| Adrenergic $\alpha_{1A}$ (human)    | 85 |
| Adrenergic $\alpha_{1B}$ (human)    | 87 |
| Adrenergic $\alpha_{1D}$ (human)    | 63 |
| Adrenergic $\alpha_{2A}$ (human)    | 69 |
| Adrenergic $\alpha_{2B}$ (human)    | 80 |
| Adrenergic $\alpha_{2C}$ (human)    | 58 |
| Adrenergic $\beta_1$ (human)        | 8  |
| Adrenergic $\beta_2$ (human)        | -8 |
| Androgen (testosterone)             | 7  |
| Angiotensin AT <sub>1</sub> (human) | 8  |
| Bradykinin B <sub>2</sub> (human)   | -1 |
| Cannabinoid CB <sub>1</sub> (human) | 12 |

|                                                   |     |
|---------------------------------------------------|-----|
| Cannabinoid CB <sub>2</sub> (human)               | -14 |
| Chemokine CCR <sub>1</sub> (human)                | -13 |
| Chemokine CXCR <sub>2</sub> (human)               | -6  |
| Cholecystokinin CCK <sub>1</sub> (human)          | -8  |
| Cholecystokinin CCK <sub>2</sub> (human)          | -5  |
| D <sub>1</sub> (human)                            | 8   |
| D <sub>2L</sub> (human)                           | 39  |
| D <sub>2S</sub> (human)                           | 41  |
| Endothelin ET <sub>A</sub> (human)                | 27  |
| Estrogen Er $\alpha$ (human)                      | 7   |
| GABA <sub>A</sub> (chloride channel, TBOB) (rat)  | 0   |
| GABA <sub>A</sub> (flunitrazepam, central) (rat)  | -4  |
| GABA <sub>A</sub> (Ro-15-1788, hippocampus) (rat) | 3   |
| GABA <sub>B1A</sub> (human)                       | -10 |
| Glucocorticoid (human)                            | 1   |
| Glutamate, AMPA (rat)                             | -4  |

|                                         |     |
|-----------------------------------------|-----|
| Glutamate, kainate (rat)                | 8   |
| Glutamate, NMDA (agonism) (rat)         | -3  |
| Glutamate, NMDA (glycine) (rat)         | -10 |
| Glutamate, NMDA (phencyclidine) (rat)   | 5   |
| Glutamate, NMDA (polyamine)             | 7   |
| Glycine, strychnine-sensitive (rat)     | -4  |
| Histamine H <sub>1</sub> (human)        | 91  |
| Histamine H <sub>2</sub> (human)        | 7   |
| Leukotriene, CysLT <sub>1</sub> (human) | -3  |
| Melanocortin MC <sub>1</sub> (human)    | -1  |
| Melanocortin MC <sub>4</sub> (human)    | -2  |
| Muscarinic M <sub>1</sub> (human)       | 3   |
| Muscarinic M <sub>2</sub> (human)       | 4   |
| Muscarinic M <sub>3</sub> (human)       | 15  |
| Muscarinic M <sub>4</sub> (human)       | 0   |
| Neuropeptide Y, Y <sub>1</sub> (human)  | 5   |

|                                         |     |
|-----------------------------------------|-----|
| Nicotinic, nACh <sub>α1</sub> (human)   | -1  |
| Nicotinic, nACh <sub>α3β4</sub> (human) | 64  |
| Opioid, δ <sub>1</sub> (human)          | -11 |
| Opioid, κ (human)                       | -1  |
| Opioid, μ (human)                       | 5   |
| Platelet activating factor (human)      | 5   |
| PPAR <sub>γ</sub> (human)               | -3  |
| Progesterone, PR <sub>B</sub> (human)   | -21 |
| Serotonin 5-HT <sub>1A</sub> (human)    | 98  |
| Serotonin 5-HT <sub>1B</sub> (human)    | 76  |
| Serotonin 5-HT <sub>2A</sub> (human)    | 94  |
| Serotonin 5-HT <sub>2B</sub> (human)    | 96  |
| Serotonin 5-HT <sub>2C</sub> (human)    | 93  |
| Serotonin 5-HT <sub>3</sub> (human)     | 6   |
| Serotonin 5-HT <sub>5A</sub> (human)    | 70  |
| Serotonin 5-HT <sub>6</sub> (human)     | 86  |

|                                               |     |
|-----------------------------------------------|-----|
| Serotonin 5-HT <sub>7</sub> (human)           | 96  |
| Sigma, $\sigma_1$ (human)                     | 45  |
| Tachykinin, NK <sub>1</sub>                   | 18  |
| Vasopressin, V1 <sub>A</sub>                  | -5  |
| Adenosine (guinea pig)                        | 6   |
| Dopamine (human)                              | 22  |
| GABA (rat)                                    | 0   |
| Norepinephrine (human)                        | 49  |
| Serotonin                                     | 25  |
| Calcium, L-type (benzothiazepine) (rat)       | 29  |
| Calcium, L-type (dihydropyridine) (rat)       | -19 |
| Calcium, L-type (phenylalkylamine) (rat)      | 47  |
| Calcium, N-type (rat)                         | -5  |
| Potassium channel, K <sub>ATP</sub> (hamster) | 15  |
| Potassium channel, hERG (human)               | 22  |
| Sodium channel, site 2 (rat)                  | 13  |



|                                                       |    |
|-------------------------------------------------------|----|
| Sodium/potassium ATPase (pig)                         | 4  |
| Acetylcholinesterase (human)                          | 39 |
| Angiotensin converting enzyme (human)                 | 5  |
| Cyclooxygenase, COX-1 (human)                         | 14 |
| Cyclooxygenase, COX-2 (human)                         | 15 |
| Monoamine oxidase A (human)                           | 84 |
| Monoamine oxidase B (human)                           | 6  |
| Peptidase, Cathepsin G (human)                        | 1  |
| Phosphodiesterase, PDE3A (human)                      | -6 |
| Phosphodiesterase, PDE4D2 (human)                     | -2 |
| Serine/threonine protein kinase, PCK $\alpha$ (human) | -2 |
| Insulin receptor protein tyrosine kinase (human)      | 36 |
| Lymphocyte-specific protein tyrosine kinase (human)   | 9  |

## **Biological Methods**

All radioligands and reagents used in the in vitro studies were supplied by Perkin Elmer and cell lines or tissue by Perkin Elmer, EPDST, Charles River, and Eurofins Discovery Services.

**S6: Table S2. In Vitro Receptor, Transporter and Ion Channel Binding Assays**

|                           | <b>Source</b>                         | <b>B<sub>max</sub></b><br><b>(pmole/mg</b><br><b>protein)</b> | <b>Incubation</b>                                                                                   | <b>Radioligand</b>                      | <b>Specific</b><br><b>binding</b><br><b>(K<sub>D</sub>)*</b> | <b>Non-specific</b><br><b>ligand</b> |
|---------------------------|---------------------------------------|---------------------------------------------------------------|-----------------------------------------------------------------------------------------------------|-----------------------------------------|--------------------------------------------------------------|--------------------------------------|
| <b>Receptors</b>          |                                       |                                                               |                                                                                                     |                                         |                                                              |                                      |
| Adenosine A <sub>1</sub>  | Human<br>recombinant<br>CHO-K1 cells  | 2.70                                                          | 90 min at 25 °C; 20<br>mM HEPES (pH 7.4),<br>10 mM magnesium<br>chloride, 100 mM<br>sodium chloride | 1.0 nM [ <sup>3</sup> H]-<br>DPCPX      | 85% (1.40<br>nM)                                             | 100 μM R(-)-<br>PIA                  |
| Adenosine A <sub>2A</sub> | Human<br>recombinant<br>HEK-293 cells | 7.0                                                           | 90 min at 25 °C; 50<br>mM TRIS-HCl (pH<br>7.4), 10 mM                                               | 0.05 μM [ <sup>3</sup> H]-<br>CGS-21680 | 85% (0.064<br>μM)                                            | 50.0 μM NECA                         |

|                          |                                      |      |                                                                                                                |                               |                  |                              |
|--------------------------|--------------------------------------|------|----------------------------------------------------------------------------------------------------------------|-------------------------------|------------------|------------------------------|
|                          |                                      |      | magnesium chloride,<br>1 mM EDTA, 2<br>IU/mL adenosine<br>deaminase                                            |                               |                  |                              |
| Adrenergic $\alpha_{1A}$ | Human<br>recombinant<br>Chem-1 cells | 8.70 | 60 min at 25 °C; 50<br>mM HEPES (pH 7.4),<br>5 mM magnesium<br>chloride, 1 mM<br>calcium chloride,<br>0.2% BSA | 0.2 nM [ $^3$ H]-<br>prazosin | 90% (0.57<br>nM) | 10.0 $\mu$ M<br>phentolamine |
| Adrenergic $\alpha_{1B}$ | Human<br>recombinant<br>Chem-1 cells | 6.20 | 60 min at 25 °C; 50<br>mM HEPES (pH 7.4),<br>10 mM magnesium<br>chloride, 1 mM<br>EDTA                         | 0.2 nM [ $^3$ H]-<br>prazosin | 90% (0.13<br>nM) | 10.0 $\mu$ M<br>phentolamine |

|                          |                                       |      |                                                                                                       |                                   |                  |                              |
|--------------------------|---------------------------------------|------|-------------------------------------------------------------------------------------------------------|-----------------------------------|------------------|------------------------------|
| Adrenergic $\alpha_{1D}$ | Human<br>recombinant<br>HEK-293 cells | 0.17 | 60 min at 25 °C; 50<br>mM TRIS-HCl (pH<br>7.4)                                                        | 0.6 nM [ $^3$ H]-<br>prazosin     | 80% (0.58<br>nM) | 10.0 $\mu$ M<br>phentolamine |
| Adrenergic $\alpha_{2A}$ | Human<br>recombinant<br>CHO-K1 cells  | 16.0 | 60 min at 25 °C; 50<br>mM TRIS-HCl (pH<br>7.4), 1 mM EDTA                                             | 1.50 nM [ $^3$ H]-<br>rauwolscine | 95% (1.50<br>nM) | 10.0 $\mu$ M WB-<br>1401     |
| Adrenergic $\alpha_{2B}$ | Human<br>recombinant<br>CHO-K1 cells  | 12.0 | 60 min at 25 °C; 50<br>mM TRIS-HCl (pH<br>7.4), 1 mM EDTA,<br>12.5 mM magnesium<br>chloride, 0.2% BSA | 2.50 nM [ $^3$ H]-<br>rauwolscine | 90% (2.10<br>nM) | 10 $\mu$ M prazosin          |
| Adrenergic $\alpha_{2C}$ | Human<br>recombinant<br>CHO-K1 cells  | 12.0 | 60 min at 25 °C; 50<br>mM TRIS-HCl (pH<br>7.4), 1 mM EDTA                                             | 0.50 nM [ $^3$ H]-<br>rauwolscine | 95% (0.4<br>nM)  | 10 $\mu$ M WB-401            |

|                      |                                      |       |                                                                                                                                            |                                     |                |                              |
|----------------------|--------------------------------------|-------|--------------------------------------------------------------------------------------------------------------------------------------------|-------------------------------------|----------------|------------------------------|
| Adrenergic $\beta_1$ | Human<br>recombinant<br>CHO-K1 cells | 0.071 | 120 min at 25 °C; 50 mM TRIS-HCl (pH 7.4), 1.4 mM ascorbic acid, 5 mM EDTA, 120 mM magnesium chloride, 1.5 mM calcium chloride, 0.001% BSA | 0.03 nM [ $^{125}$ I]-cyanopindolol | 95% (0.041 nM) | 100 $\mu$ M S(-)-propranolol |
| Adrenergic $\beta_2$ | Human<br>recombinant<br>CHO cells    | 0.44  | 60 min at 25 °C; 50 mM TRIS-HCl (pH 7.4), 0.5 mM EDTA, 5 mM magnesium chloride, 120 mM NaCl                                                | 0.2 nM [ $^3$ H]-CGP-12177          | 95% (0.44 nM)  | 10.0 $\mu$ M ICI-118551      |

|                             |                                      |      |                                                                                                        |                                                                                           |                   |                        |
|-----------------------------|--------------------------------------|------|--------------------------------------------------------------------------------------------------------|-------------------------------------------------------------------------------------------|-------------------|------------------------|
| Androgen<br>(testosterone)  | Human<br>LNCaP clone<br>FGC cells    | 0.25 | 20 h at 4 °C; 25 mM<br>HEPES (pH 7.4),<br>10% glycerol, 1 mM<br>EDTA, 10 mM<br>molybdate               | 0.5 nM [ <sup>3</sup> H]-<br>methyltrienolone                                             | 75% (0.71<br>nM)  | 1.0 μM<br>testosterone |
| Angiotensin AT <sub>1</sub> | Human<br>recombinant<br>CHO-K1 cells | 16.0 | 180 min at 37 °C; 50<br>mM TRIS-HCl (pH<br>7.4), 5 mM<br>magnesium chloride,<br>0.1% BSA, 1 mM<br>EDTA | 20.0 pM [ <sup>125</sup> I]-<br>(Sar <sup>1</sup> , Ile <sup>8</sup> )-<br>angiotensin II | 90% (0.056<br>nM) |                        |
| Bradykinin B <sub>2</sub>   | Human<br>recombinant<br>Chem-1 cells | 9.40 | 60 min at 25 °C; 50<br>mM HEPES (pH 7.4),<br>0.2% BSA, 1 mM<br>calcium chloride, 5<br>mM magnesium     | 0.5 nM [ <sup>3</sup> H]-<br>bradykinin                                                   | 90% (0.85<br>nM)  | 5.0 μM<br>bradykinin   |

|                             |              |      |                      |                                 |           |              |
|-----------------------------|--------------|------|----------------------|---------------------------------|-----------|--------------|
|                             |              |      | chloride, 0.05 mM    |                                 |           |              |
|                             |              |      | bacitracin           |                                 |           |              |
| Cannabinoid CB <sub>1</sub> | Human        | 15.0 | 60 min at 37 °C; 50  | 2.0 nM [ <sup>3</sup> H]-       | 78% (18.0 | 10.0 μM CP-  |
|                             | recombinant  |      | mM HEPES (pH 7.4),   | SR141716A                       | nM)       | 55,940       |
|                             | Chem-1 cells |      | 0.2% BSA, 1 mM       |                                 |           |              |
|                             |              |      | calcium chloride, 5  |                                 |           |              |
|                             |              |      | mM magnesium         |                                 |           |              |
|                             |              |      | chloride             |                                 |           |              |
| Cannabinoid CB <sub>2</sub> | Human        | 1.70 | 90 min at 37 °C; 20  | 2.40 nM [ <sup>3</sup> H]-      | 80% (4.90 | 10 uM R(+)-  |
|                             | recombinant  |      | mM HEPES (pH 7.0),   | WIN-55,212-2                    | nM)       | WIN-55,212-2 |
|                             | CHO-K1 cells |      | 0.5% BSA             |                                 |           |              |
| Chemokine CCR <sub>1</sub>  | Human        | 1.10 | 180 min at 25 °C; 50 | 0.1 nM [ <sup>125</sup> I]-MIP- | 72% (0.46 | 0.1 μM MCP-3 |
|                             | recombinant  |      | mM HEPES (pH 7.4),   | 1α                              | nM)       |              |
|                             | Chem-2 cells |      | 0.2% BSA, 1 mM       |                                 |           |              |
|                             |              |      | calcium chloride, 5  |                                 |           |              |

|                   |                              |      |                                                                                         |                                  |               |              |
|-------------------|------------------------------|------|-----------------------------------------------------------------------------------------|----------------------------------|---------------|--------------|
| Chemokine         | Human                        | 0.28 | 60 min at 25 °C; 25 mM magnesium chloride                                               | 15.0 pM [ <sup>125</sup> I]-IL-8 | 80% (12.0 pM) | 10.0 nM IL-8 |
| CXCR <sub>2</sub> | recombinant<br>CHO-K1 cells  |      | mM HEPES (pH 7.4),<br>0.2% BSA, 2 mM<br>calcium chloride, 1<br>mM magnesium<br>chloride | (80%)                            |               |              |
| Cholecystokinin   | Human                        | 2.30 | 180 min at 25 °C; 25 mM magnesium chloride                                              | 0.11 nM [ <sup>125</sup> I]-     | 85% (0.59 nM) | 1.0 μM L-    |
| CCK <sub>1</sub>  | recombinant<br>1321-N1 cells |      | mM HEPES (pH 7.4),<br>0.1% BSA, 1 mM<br>calcium chloride, 5<br>mM magnesium<br>chloride | CCK-8                            |               | 364,718      |



|                                     |                                      |      |                                                                                                                    |                                         |                   |                            |
|-------------------------------------|--------------------------------------|------|--------------------------------------------------------------------------------------------------------------------|-----------------------------------------|-------------------|----------------------------|
| Cholecystokinin<br>CCK <sub>2</sub> | Human<br>recombinant<br>Chem-1 cells | 9.40 | 180 min at 25 °C; 50<br>mM HEPES (pH 7.4),<br>0.1% BSA, 1 mM<br>calcium chloride, 5<br>mM magnesium<br>chloride    | 0.05 nM [ <sup>125</sup> I]-<br>CCK-8   | 90% (0.069<br>nM) | 1.0 μM<br>sincalide        |
| Dopamine D <sub>1</sub>             | Human<br>recombinant<br>CHO cells    | 0.63 | 120 min at 37 °C; 50<br>mM TRIS-HCl (pH<br>7.4), 1.4 mM ascorbic<br>acid, 0.001% BSA,<br>150 mM sodium<br>chloride | 1.40 nM [ <sup>3</sup> H]-<br>SCH-23390 | 90% (1.40<br>nM)  | 10.0 μM (+)-<br>butaclamol |
| Dopamine D <sub>2L</sub>            | Human<br>recombinant<br>CHO cells    | 0.48 | 1.0% DMSO<br>120 min at 25 °C; 50<br>mM TRIS-HCl (pH<br>7.4), 1.4 mM ascorbic                                      | 0.16 nM [ <sup>3</sup> H]-<br>spiperone | 85% (0.08<br>Nm)  | 10.0 μM<br>haloperidol     |

|                            |                                          |      |                                                                                                                    |                                              |                   |                              |
|----------------------------|------------------------------------------|------|--------------------------------------------------------------------------------------------------------------------|----------------------------------------------|-------------------|------------------------------|
|                            |                                          |      | acid, 0.001% BSA,<br>150 mM sodium<br>chloride                                                                     |                                              |                   |                              |
| Dopamine D <sub>2S</sub>   | Human<br>recombinant<br>CHO cells        | 1.60 | 120 min at 25 °C; 50<br>mM TRIS-HCl (pH<br>7.4), 1.4 mM ascorbic<br>acid, 0.001% BSA,<br>150 mM sodium<br>chloride | 0.16 nM [ <sup>3</sup> H]-<br>spiperone      | 90% (0.09<br>nM)  | 10.0 μM<br>haloperidol       |
| Endothelin ET <sub>A</sub> | Human<br>recombinant<br>CHO-S cells      | 0.35 | 120 min at 37 °C; 50<br>mM TRIS-HCl (pH<br>7.4), 0.1% BSA, 0.5<br>mM calcium chloride                              | 0.03 nM [ <sup>125</sup> I]-<br>endothelin-1 | 90% (0.048<br>nM) | 0.1 μM<br>endothelin-1       |
| Estrogen ER <sub>α</sub>   | Human<br>recombinant<br>insect Sf9 cells | 1400 | 120 min at 25 °C; 10<br>mM TRIS-HCl (pH                                                                            | 0.5 nM [ <sup>3</sup> H]-<br>estradiol       | 85% (0.2<br>nM)   | 1.0 μM<br>diethylstilbestrol |

|                                                    |                                           |      |                                                                                          |                                            |                   |                      |
|----------------------------------------------------|-------------------------------------------|------|------------------------------------------------------------------------------------------|--------------------------------------------|-------------------|----------------------|
|                                                    |                                           |      | 7.4), 0.1% BSA, 10%<br>glycerol, 1 mM DTT                                                |                                            |                   |                      |
| GABA <sub>A</sub> (chloride<br>channel, TBOB)      | Wistar rat<br>brain (minus<br>cerebellum) | 2.10 | 120 min at 25 °C; 50<br>mM potassium<br>phosphate (pH 7.4),<br>200 mM sodium<br>chloride | 3.0 nM [ <sup>3</sup> H]-TBOB              | 78% (0.026<br>μM) | 200 μM<br>picrotoxin |
| GABA <sub>A</sub><br>(flunitrazepam,<br>central)   | Wistar rat<br>brain (minus<br>cerebellum) | 1.20 | 60 min at 25 °C; 50<br>mM phosphate buffer<br>(pH 7.4)                                   | 1.0 nM [ <sup>3</sup> H]-<br>flunitrazepam | 91% (4.40<br>nM)  | 10.0 μM<br>diazepam  |
| GABA <sub>A</sub> (Ro-15-<br>1788,<br>hippocampus) | Wistar rat<br>hippocampus                 | 1.20 | 120 min at 4 °C; 50<br>mM TRIS-citrate (pH<br>7.4)                                       | 1.0 nM [ <sup>3</sup> H]-Ro-<br>15-1788    | 96% (1.20<br>nM)  | 10.0 μM<br>diazepam  |
| GABA <sub>B1A</sub>                                | Human<br>recombinant<br>CHO-K1 cells      | 48.0 | 180 min at 25 °C; 50<br>mM TRIS-HCl (pH                                                  | 4.0 nM [ <sup>3</sup> H]-CGP-<br>54626     | 90% (3.30<br>nM)  | 30.0 mM<br>GABA      |

|                 |                                |      |                                                                                                                                           |                                        |               |                        |
|-----------------|--------------------------------|------|-------------------------------------------------------------------------------------------------------------------------------------------|----------------------------------------|---------------|------------------------|
| Glucocorticoid  | Human recombinant insect cells | 1.0  | 24 h min at 4 °C; 1.5 mM potassium phosphate, 8 mM sodium phosphate (pH 7.4), 137 mM sodium chloride, 2.7 mM potassium chloride, 0.1% BSA | 5.0 nM [ <sup>3</sup> H]-dexamethasone | 97% (4.60 nM) | 10.0 μM dexamethasone  |
| Glutamate, AMPA | Wistar rat cerebral cortex     | 17.0 | 90 min at 4 °C; 50 mM TRIS-HCl (pH 7.4), 200 mM potassium thiocyanate                                                                     | 5.0 nM [ <sup>3</sup> H]-AMPA          | 90% (0.99 μM) | 1.0 mM L-glutamic acid |

|                              |                 |      |                      |                                 |            |               |
|------------------------------|-----------------|------|----------------------|---------------------------------|------------|---------------|
| Glutamate, kainate           | Wistar rat      | 0.21 | 120 min at 4 °C; 50  | 6.0 nM [ <sup>3</sup> H]-kainic | 80% (5.40  | 1.0 mM L-     |
|                              | cerebral cortex |      | mM TRIS-HCl (pH      | acid                            | nM)        | glutamic acid |
|                              |                 |      | 7.4)                 |                                 |            |               |
| Glutamate mGluR <sub>5</sub> | Human           | 0.68 | 120 min at 25 °C; 25 | 0.03 μM [ <sup>3</sup> H]-      | 85% (0.026 | 1.0 mM L-     |
|                              | recombinant     |      | mM HEPES (pH 7.4),   | quisqualic acid                 | μM)        | glutamic acid |
|                              | CHO-K1 cells    |      | 2.5 mM calcium       |                                 |            |               |
|                              |                 |      | chloride, 1 mM       |                                 |            |               |
|                              |                 |      | magnesium chloride   |                                 |            |               |
| Glutamate, NMDA              | Wistar rat      | 2.30 | 20 min at 4 °C; 50   | 2.0 nM [ <sup>3</sup> H]-CGP-   | 70% (19.0  | 1.0 mM L-     |
| (agonism)                    | cerebral cortex |      | mM TRIS-HCl (pH      | 39653                           | nM)        | glutamic acid |
|                              |                 |      | 7.4)                 |                                 |            |               |
| Glutamate, NMDA              | Wistar rat      | 3.70 | 30 min at 4 °C; 50   | 0.33 nM [ <sup>3</sup> H]-      | 85% (6.0   | 10.0 μM MDL-  |
| (glycine)                    | cerebral cortex |      | mM HEPES (pH 7.7)    | MDL-105,519                     | nM)        | 105,519       |
| Glutamate, NMDA              | Wistar rat      | 0.78 | 45 min at 25 °C; 10  | 4.0 nM [ <sup>3</sup> H]-TCP    | 94% (8.40  | 1.0 μM MK-801 |
| (phencyclidine)              | cerebral cortex |      | mM TRIS-HCl (pH      |                                 | nM)        |               |
|                              |                 |      | 7.4)                 |                                 |            |               |

|                                      |                                      |      |                                                                                        |                                                 |                   |                       |
|--------------------------------------|--------------------------------------|------|----------------------------------------------------------------------------------------|-------------------------------------------------|-------------------|-----------------------|
| Glutamate, NMDA<br>(polyamine)       | Wistar rat<br>cerebral cortex        | 1.10 | 120 min at 4 °C; 50<br>mM TRIS-HCl (pH<br>7.4)                                         | 2.0 nM [ <sup>3</sup> H]-<br>ifenprodil         | 80% (0.026<br>μM) | 10.0 μM<br>ifenprodil |
| Glycine,<br>strychnine-<br>sensitive | Wistar rat<br>spinal cord            | 0.35 | 10 min at 4 °C; 50<br>mM potassium<br>phosphate (pH 7.4),<br>200 mM sodium<br>chloride | 10.0 nM [ <sup>3</sup> H]-<br>strychnine        | 77% (13.0<br>nM)  | 1.0 mM glycine        |
| Histamine H <sub>1</sub>             | Human<br>recombinant<br>CHO-K1 cells | 6.70 | 180 min at 25 °C; 50<br>mM TRIS-HCl (pH<br>7.4), 5 mM<br>magnesium chloride            | 1.20 nM [ <sup>3</sup> H]-<br>pyrilamine        | 94% (1.10<br>nM)  | 1.0 μM<br>pyrilamine  |
| Histamine H <sub>2</sub>             | Human<br>recombinant<br>CHO-K1 cells | 6.90 | 120 min at 25 °C; 50<br>mM phosphate buffer<br>(pH 7.4), 0.2% gelatin                  | 0.1 nM [ <sup>125</sup> I]-<br>aminopotentidine | 90% (0.45<br>nM)  | 3.0 μM tiotidine      |

|                                   |                                      |      |                                                                                                                                               |                                         |                |                       |
|-----------------------------------|--------------------------------------|------|-----------------------------------------------------------------------------------------------------------------------------------------------|-----------------------------------------|----------------|-----------------------|
| Leukotriene<br>CysLT <sub>1</sub> | Human<br>recombinant<br>CHO-K1 cells | 3.0  | 30 min at 25 °C; 50 mM TRIS-HCl (pH 7.4), 5 mM calcium chloride, 5 mM magnesium chloride, 100 µg/ml bacitracin, 1 mM benzamidine, 0.1 mM PMSF | 0.3 nM [ <sup>3</sup> H]-leukotriene D4 | 93% (0.21 nM)  | 0.3 µM leukotriene D4 |
| Melanocortin MC <sub>1</sub>      | Human<br>recombinant<br>CHO-K1 cells | 0.53 | 120 min at 37 °C; 25 mM HEPES-KOH (pH 7.0), 100 mM sodium chloride, 1 mM 1,10-phenanthroline, 1.5 mM calcium chloride, 1 mM magnesium         | 0.04 nM [ <sup>125</sup> I]-NDP-α-MSH   | 90% (0.037 nM) | 1.0 µM NDP-α-MSH      |

|                              |               |      |                      |                              |          |               |
|------------------------------|---------------|------|----------------------|------------------------------|----------|---------------|
|                              |               |      | sulfate, 1 complete  |                              |          |               |
|                              |               |      | protease inhibitor   |                              |          |               |
|                              |               |      | tablet 100/ml        |                              |          |               |
| Melanocortin MC <sub>4</sub> | Human         | 3.90 | 120 min at 37 °C; 25 | 20.0 pM [ <sup>125</sup> I]- | 90% (0.5 | 3.0 μM NDP-α- |
|                              | recombinant   |      | mM HEPES-KOH         | NDP-α-MSH                    | nM)      | MSH           |
|                              | HEK-293 cells |      | (pH 7.0), 100 mM     |                              |          |               |
|                              |               |      | sodium chloride, 1   |                              |          |               |
|                              |               |      | mM 1,10-             |                              |          |               |
|                              |               |      | phenanthroline, 1.5  |                              |          |               |
|                              |               |      | mM calcium chloride, |                              |          |               |
|                              |               |      | 1 mM magnesium       |                              |          |               |
|                              |               |      | sulfate, 1 complete  |                              |          |               |
|                              |               |      | protease inhibitor   |                              |          |               |
|                              |               |      | tablet 100/ml        |                              |          |               |



|                           |                                      |      |                                                                                            |                                                  |                  |                 |
|---------------------------|--------------------------------------|------|--------------------------------------------------------------------------------------------|--------------------------------------------------|------------------|-----------------|
| Muscarinic M <sub>1</sub> | Human<br>recombinant<br>CHO-K1 cells | 2.0  | 120 min at 25 °C; 50<br>mM TRIS-HCl (pH<br>7.4), 10 mM<br>magnesium chloride,<br>1 mM EDTA | 0.8 nM [ <sup>3</sup> H]-N-<br>methylscopolamine | 95% (0.26<br>nM) | 1.0 μM atropine |
| Muscarinic M <sub>2</sub> | Human<br>recombinant<br>CHO-K1 cells | 5.10 | 120 min at 25 °C; 50<br>mM TRIS-HCl (pH<br>7.4), 10 mM<br>magnesium chloride,<br>1 mM EDTA | 0.8 nM [ <sup>3</sup> H]-N-<br>methylscopolamine | 95% (0.58<br>nM) | 1.0 μM atropine |
| Muscarinic M <sub>3</sub> | Human<br>recombinant<br>CHO-K1 cells | 5.40 | 120 min at 25 °C; 50<br>mM TRIS-HCl (pH<br>7.4), 10 mM<br>magnesium chloride,<br>1 mM EDTA | 0.8 nM [ <sup>3</sup> H]-N-<br>methylscopolamine | 95% (0.75<br>nM) | 1.0 μM atropine |

|                               |                                |      |                                                                                                                     |                                              |               |                                    |
|-------------------------------|--------------------------------|------|---------------------------------------------------------------------------------------------------------------------|----------------------------------------------|---------------|------------------------------------|
| Muscarinic M <sub>4</sub>     | Human recombinant CHO-K1 cells | 1.60 | 120 min at 25 °C; 50 mM TRIS-HCl (pH 7.4), 10 mM magnesium chloride, 1 mM EDTA                                      | 0.8 nM [ <sup>3</sup> H]-N-methylscopolamine | 95% (0.22 nM) | 1.0 μM atropine                    |
| Neuropeptide Y Y <sub>1</sub> | Human SK-N-MC cells            | 0.58 | 60 min at 37 °C; 25 mM HEPES (pH 7.4), 1 mM magnesium chloride, 2.5 mM calcium chloride, 0.1% BSA, 0.01% bacitracin | 15.0 pM [ <sup>125</sup> I]-peptide YY       | 80% (0.24 nM) | 1.0 μM neuropeptide Y (human, rat) |
| Nicotinic nAChR <sub>α1</sub> | Human RD cells                 | 1.0  | 120 min at 25 °C; 147 mM sodium chloride (pH 7.4), 4 mM potassium chloride,                                         | 0.6 nM [ <sup>125</sup> I]-α-bungarotoxin    | 85% (1.10 nM) | 1.0 μM α-bungarotoxin              |

|                                 |                                 |      |                                                                               |                                        |                |                     |
|---------------------------------|---------------------------------|------|-------------------------------------------------------------------------------|----------------------------------------|----------------|---------------------|
|                                 |                                 |      | 2.2 mM calcium chloride                                                       |                                        |                |                     |
| Nicotinic nAChR <sub>α3β4</sub> | Human recombinant CHO-K1 cells  | 1.50 | 60 min at 25 °C; 50 mM TRIS-HCl (pH 7.4)                                      | 0.05 nM [ <sup>3</sup> H]-epibatidine  | 90% (0.13 nM)  | 10.0 μM epibatidine |
| Opioid δ <sub>1</sub>           | Human recombinant HEK-293 cells | 1.40 | 60 min at 25 °C; 50 mM TRIS-HCl (pH 7.4), 1 mM EDTA, 10 mM magnesium chloride | 1.30 nM [ <sup>3</sup> H]-naltrindole  | 95% (0.053 nM) | 1.0 μM naltrindole  |
| Opioid κ                        | Human recombinant HEK-293 cells | 1.10 | 60 min at 25 °C; 50 mM TRIS-HCl (pH 7.4)                                      | 0.6 nM [ <sup>3</sup> H]-diprenorphine | 90% (0.41 nM)  | 10.0 μM naloxone    |
| Opioid μ                        | Human recombinant CHO-K1 cells  | 3.80 | 60 min at 25 °C; 50 mM TRIS-HCl (pH 7.4)                                      | 0.6 nM [ <sup>3</sup> H]-diprenorphine | 90% (0.41 nM)  | 10.0 μM naloxone    |

|                              |                                |                   |                                                                                                                                                |                                        |               |                       |
|------------------------------|--------------------------------|-------------------|------------------------------------------------------------------------------------------------------------------------------------------------|----------------------------------------|---------------|-----------------------|
| Platelet activating factor   | Human recombinant CHO-K1 cells | 0.78              | 60 min at 25 °C; 25 mM HEPES (pH 7.4), 10 mM magnesium chloride, 0.3% BSA                                                                      | 1.0 nM [ <sup>3</sup> H]-PAF           | 80% (1.50 nM) | 10.0 μM C16-PAF       |
| PPAR <sub>γ</sub>            | Human recombinant insect cells | 5400              | 24 h at 4 °C; 10 mM TRIS-HCl (pH 7.4), 1 mM EDTA, 10% glycerol, 1 mM DTT, 1 μg/ml benzamidine, 10 mM sodium molybdate, 0.1% non-fat dried milk | 5.0 nM [ <sup>3</sup> H]-rosiglitazone | 95% (20.0 nM) | 10.0 μM rosiglitazone |
| Progesterone PR <sub>B</sub> | Human T-47D cells              | 0.0002 fmole/cell | 20 h at 4 °C; 5 mM sodium phosphate (pH 7.4), 10% glycerol, 10 mM                                                                              | 0.5 nM [ <sup>3</sup> H]-progesterone  | 91% (2.0 nM)  | 1.0 μM R-5020         |

|                              |                                      |      |                                                                                                                   |                                         |                  |                        |
|------------------------------|--------------------------------------|------|-------------------------------------------------------------------------------------------------------------------|-----------------------------------------|------------------|------------------------|
|                              |                                      |      | monothiolglycerol, 20<br>mM sodium<br>molybdate                                                                   |                                         |                  |                        |
| Serotonin 5-HT <sub>1A</sub> | Human<br>recombinant<br>CHO-K1 cells | 1.30 | 60 min at 25 °C; 50<br>mM TRIS-HCl (pH<br>7.4), 0.1% ascorbic<br>acid, 0.5 mM EDTA,<br>10 mM magnesium<br>sulfate | 1.50 nM [ <sup>3</sup> H]-8-<br>OH-DPAT | 75% (2.0<br>nM)  | 10.0 μM<br>metergoline |
| Serotonin 5-HT <sub>1B</sub> | Human<br>recombinant<br>Chem-1 cells | 22.0 | 90 min at 37 °C; 50<br>mM TRIS-HCl (pH<br>7.4), 1 mM EDTA, 10<br>mM magnesium<br>chloride                         | 1.0 nM [ <sup>3</sup> H]-<br>GR125743]  | 90% (3.20<br>nM) | 10.0 μM<br>serotonin   |

|                              |                                 |      |                                                                                     |                                                      |               |                   |
|------------------------------|---------------------------------|------|-------------------------------------------------------------------------------------|------------------------------------------------------|---------------|-------------------|
| Serotonin 5-HT <sub>2A</sub> | Human recombinant CHO-K1 cells  | 0.51 | 60 min at 25 °C; 50 mM TRIS-HCl (pH 7.4)                                            | 0.5 nM [ <sup>3</sup> H]-ketanserin                  | 90% (0.2 nM)  | 1.0 μM mianserin  |
| Serotonin 5-HT <sub>2B</sub> | Human recombinant CHO-K1 cells  | 1.10 | 60 min at 25 °C; 50 mM TRIS-HCl (pH 7.4), 0.1% ascorbic acid, 4 mM calcium chloride | 1.20 nM [ <sup>3</sup> H]-lysergic acid diethylamide | 80% (2/10 nM) | 10.0 μM serotonin |
| Serotonin 5-HT <sub>2C</sub> | Human recombinant CHO-K1 cells  | 4.90 | 60 min at 25 °C; 50 mM TRIS-HCl (pH 7.4), 0.1% ascorbic acid, 10 μM pargyline       | 1.0 nM [ <sup>3</sup> H]-mesulergine                 | 90% (1.10 nM) | 1.0 μM mianserin  |
| Serotonin 5-HT <sub>3</sub>  | Human recombinant HEK-293 cells | 11.0 | 60 min at 25 °C; 50 mM TRIS-HCl (pH 7.4), 1 mM EDTA, 5                              | 0.69 nM [ <sup>3</sup> H]-GR-65630                   | 90% (0.2 nM)  | 10.0 μM MDL-72222 |

|                              |                                |      |                                                                                                   |                                                      |               |                   |
|------------------------------|--------------------------------|------|---------------------------------------------------------------------------------------------------|------------------------------------------------------|---------------|-------------------|
|                              |                                |      | mM magnesium chloride                                                                             |                                                      |               |                   |
| Serotonin 5-HT <sub>5A</sub> | Human recombinant CHO-K1 cells | 4.30 | 60 min at 25 °C; 50 mM TRIS-HCl (pH 7.4), 0.5 mM EDTA, 10 mM magnesium chloride                   | 1.70 nM [ <sup>3</sup> H]-lysergic acid diethylamide | 80% (1.80 nM) | 100 μM serotonin  |
| Serotonin 5-HT <sub>6</sub>  | Human recombinant HeLa cells   | 1.70 | 120 min at 37 °C; 50 mM TRIS-HCl (pH 7.4), 150 mM sodium chloride, 2 mM ascorbic acid, 0.001% BSA | 1.50 nM [ <sup>3</sup> H]-lysergic acid diethylamide | 90% (1.30 nM) | 5.0 μM serotonin  |
| Serotonin 5-HT <sub>7</sub>  | Human recombinant CHO-K1 cells | 0.95 | 120 min at 25 °C; 50 mM TRIS-HCl (pH 7.4), 0.5 mM EDTA,                                           | 5.50 nM [ <sup>3</sup> H]-lysergic acid diethylamide | 90% (7.40 nM) | 10.0 μM serotonin |

|                             |                                 |      |                                                                              |                                                                         |               |                                              |
|-----------------------------|---------------------------------|------|------------------------------------------------------------------------------|-------------------------------------------------------------------------|---------------|----------------------------------------------|
|                             |                                 |      | 10 mM magnesium chloride                                                     |                                                                         |               |                                              |
| Sigma $\sigma_1$            | Human Jurkat cells              | 1.08 | 120 min at 37 °C; 50 mM TRIS-HCl (pH 8.0)                                    | 15.0 nM [ <sup>3</sup> H]-pentazocine                                   | 90% (16.0 nM) | 10.0 $\mu$ M haloperidol                     |
| Tachykinin NK <sub>1</sub>  | Human recombinant CHO cells     | 1.70 | 90 min at 4 °C; 20 mM HEPES (pH 7.4), 1 mM manganese chloride, 0.1% BSA      | 0.8 nM [ <sup>3</sup> H]-substance P                                    | 90% (2.10 nM) | 10.0 $\mu$ M L-703,606                       |
| Vasopressin V <sub>1A</sub> | Human recombinant HEK-293 cells | 2.80 | 120 min at 25 °C; 50 mM TRIS-HCl (pH 7.4), 5 mM magnesium chloride, 0.1% BSA | 0.03 nM [ <sup>125</sup> I]-Phenylacetyl-Tyr(Me)-PheGlnAsnArgPro-ArgTyr | 85% (7.40 pM) | 10.0 $\mu$ M (Arg <sup>8</sup> )-vasopressin |



## Transporters

|           |                                                                |       |                                                                                                             |                                                      |                  |                                         |
|-----------|----------------------------------------------------------------|-------|-------------------------------------------------------------------------------------------------------------|------------------------------------------------------|------------------|-----------------------------------------|
| Adenosine | Duncan<br>Hartley-<br>derived<br>Guinea pig<br>cerebral cortex | 0.24  | 30 min at 25 °C; 50<br>mM TRIS-HCl (pH<br>7.4)                                                              | 0.5 nM [ <sup>3</sup> H]-nitro-<br>benzylthioinosine | 90% (0.26<br>nM) | 5.0 μM nitro-<br>benzyl-<br>thioinosine |
| Dopamine  | Human<br>recombinant<br>CHO-S cells                            | 0.047 | 180 min at 4 °C; 50<br>mM TRIS-HCl (pH<br>7.4), 100 mM sodium<br>chloride, 1 μM<br>leupeptin, 10 μM<br>PMSF | 0.15 nM [ <sup>3</sup> H]-RTI-<br>55                 | 90% (0.58<br>nM) | 10.0 μM<br>nomifensine                  |
| GABA      | Wistar rat<br>brain (minus<br>cerebellum)                      | 60.0  | 20 min at 25 °C; 10<br>mM HEPES (pH 7.5),<br>120 mM sodium<br>chloride, 4 mM                                | 6.0 nM [ <sup>3</sup> H]-<br>GABA                    | 80% (0.3<br>μM)  | 10.0 μM NO-<br>711                      |

|                |               |      |                     |                               |            |             |
|----------------|---------------|------|---------------------|-------------------------------|------------|-------------|
|                |               |      | calcium acetate, 10 |                               |            |             |
|                |               |      | uM isoguvacine, 10  |                               |            |             |
|                |               |      | uM S(-)-baclofen    |                               |            |             |
| Norepinephrine | Human         | 2.50 | 180 min at 4 °C; 50 | 0.2 nM [ <sup>3</sup> H]-RTI- | 75% (0.024 | 10.0 μM     |
|                | recombinant   |      | mM TRIS-HCl (pH     | 55                            | μM)        | desipramine |
|                | MDCK cells    |      | 7.4), 100 mM sodium |                               |            |             |
|                |               |      | chloride, 1 μM      |                               |            |             |
|                |               |      | leupeptin, 10 μM    |                               |            |             |
|                |               |      | PMSF                |                               |            |             |
| Serotonin      | Human         | 4.40 | 60 min at 25 °C; 50 | 0.4 nM [ <sup>3</sup> H]-     | 95% (0.078 | 10.0 μM     |
|                | recombinant   |      | mM TRIS-HCl (pH     | paroxetine                    | nM)        | imipramine  |
|                | HEK-293 cells |      | 7.4), 120 mM sodium |                               |            |             |
|                |               |      | chloride, 5 mM      |                               |            |             |
|                |               |      | potassium chloride  |                               |            |             |

### Ion channels

|                                       |                                                |      |                                                                         |                                                          |                   |                                  |
|---------------------------------------|------------------------------------------------|------|-------------------------------------------------------------------------|----------------------------------------------------------|-------------------|----------------------------------|
| Calcium, L-type<br>(benzothiazepine)  | Wistar rat<br>brain (minus<br>cerebellum)      | 0.21 | 180 min at 4 °C; 50<br>mM TRIS-HCl (pH<br>7.4), 0.1% BSA                | 2.0 nM [ <sup>3</sup> H]-<br>diltiazem                   | 73% (16.0<br>nM)  | 10.0 μM<br>diltiazem             |
| Calcium, L-type<br>(dihydropyridine)  | Wistar rat<br>cerebral cortex                  | 0.23 | 90 min at 25 °C; 50<br>mM TRIS-HCl (pH<br>7.4)                          | 0.1 nM [ <sup>3</sup> H]-<br>nitrendipine                | 91% (0.18<br>nM)  | 1.0 μM<br>nitrendipine           |
| Calcium, L-type<br>(phenylalkylamine) | Wistar rat<br>cerebral cortex                  | 1.60 | 60 min at 25 °C; 50<br>mM HEPES (pH 7.4)                                | 0.4 nM [ <sup>3</sup> H]-(-)-<br>desmethoxy<br>verapamil | 80% (14.0<br>nM)  | 10 μM<br>desmethoxy<br>verapamil |
| Calcium, N-type                       | Wistar rat<br>frontal brain                    | 0.88 | 30 min at 4 °C; 20<br>mM TRIS-HCl (pH<br>7.4), 0.5% BSA                 | 10.0 pM [ <sup>125</sup> I]-ω-<br>conotoxin GVIA         | 96% (0.051<br>nM) | 0.1 μM ω-<br>conotoxin<br>GVIA   |
| Potassium, ATP                        | Hamster<br>pancreatic<br>HIT-T15 beta<br>cells | 1.0  | 120 min at 25 °C; 50<br>mM MOPS (pH 7.4),<br>0.1 mM calcium<br>chloride | 5.0 nM [ <sup>3</sup> H]-<br>glyburide                   | 90% (0.64<br>nM)  | 1.0 μM<br>glyburide              |

|                 |                                     |      |                                                                                                                                                       |                                          |                |                    |
|-----------------|-------------------------------------|------|-------------------------------------------------------------------------------------------------------------------------------------------------------|------------------------------------------|----------------|--------------------|
| Potassium, hERG | Human recombinant HEK-293 cells     | 6.30 | 60 min at 25 °C; 10 mM HEPES (pH 7.4), 0.1% BSA, 5 mM potassium chloride, 0.8 mM magnesium chloride, 130 mM sodium chloride, 1 mM EGTA, 10 mM glucose | 1.50 nM [ <sup>3</sup> H]-astemizole     | 90% (6.80 nM)  | 10.0 μM astemizole |
| Sodium, site 2  | Wistar rat brain (minus cerebellum) | 0.7  | 60 min at 37 °C; 10 mM HEPES, 50 mM TRIS-HCl (pH 7.4), 130 mM choline potassium chloride, 0.8 mM magnesium chloride, 5.5 mM                           | 5.0 nM [ <sup>3</sup> H]-batrachotoxinin | 77% (0.052 μM) | 100 μM veratridine |

glucose, 40 µg/ml

LqTx

\*Historical values. Vehicle for SPL026 and SPL028 was 1.0% dimethylsulfoxide was unless otherwise stated.

BSA, bovine serum albumin; DTT, dithiothreitol; EDTA, ethylenediaminetetraacetic acid); EGTA, ethylene glycol tetraacetic acid; HEPES, 4-(2-hydroxyethyl)-1-piperazineethanesulfonic acid; MOPS, 3-(N-morpholino)propanesulfonic acid; PMSF, phenylmethylsulfonyl fluoride; TRIS-HCl, tris(hydroxymethyl)aminomethane hydrochloride

S7. Table S3: *In Vitro* Enzyme Inhibition Assays

| Enzyme                  | Tissue                          | Substrate                     | Incubation buffer                                                                                  | Pre-incubation            | Incubation                | Spectro-photometric quantitation |
|-------------------------|---------------------------------|-------------------------------|----------------------------------------------------------------------------------------------------|---------------------------|---------------------------|----------------------------------|
| Sodium/potassium ATPase | Pig heart                       | 100 $\mu$ M ATP               | 50 mM TRIS-HCl (pH 7.0), 20 mM potassium chloride, 5 mM magnesium chloride, 100 mM sodium chloride | 15 min at 37 $^{\circ}$ C | 60 min at 37 $^{\circ}$ C | Pi                               |
| Acetylcholinesterase    | Human recombinant HEK-293 cells | 700 $\mu$ M acetylthiocholine | 0.1 M sodium phosphate                                                                             | 15 min at 25 $^{\circ}$ C | 20 min at 37 $^{\circ}$ C | Thiocholine                      |

|                     |                                                     |                              |                                                              |                           |                           |                     |
|---------------------|-----------------------------------------------------|------------------------------|--------------------------------------------------------------|---------------------------|---------------------------|---------------------|
| Cyclo-oxygenase 1   | Human recombinant<br>Baculovirus infected Sf9 cells | 3.0 $\mu$ M arachidonic acid | 200 mM TRIS-HCl (pH 8.0), 6 $\mu$ M EDTA, 10 $\mu$ M hematin | 15 min at 25 $^{\circ}$ C | 3 min at 25 $^{\circ}$ C  | Resorufin           |
| Cyclo-oxygenase 2   | Human recombinant<br>Insect Sf9 cells               | 3.0 $\mu$ M arachidonic acid | 200 mM TRIS-HCl (pH 8.0), 6 $\mu$ M EDTA, 10 $\mu$ M hematin | 15 min at 25 $^{\circ}$ C | 3 min at 25 $^{\circ}$ C  | Resorufin           |
| Monoamine oxidase A | Human recombinant<br>Insect cells                   | 50.0 $\mu$ M kynuramine      | 100 mM potassium phosphate (pH 7.4)                          | 15 min at 37 $^{\circ}$ C | 60 min at 37 $^{\circ}$ C | 4-hydroxy-quinoline |
| Monoamine oxidase B | Human recombinant<br>Insect cells                   | 50.0 $\mu$ M kynuramine      | 100 mM potassium phosphate (pH 7.4)                          | 15 min at 37 $^{\circ}$ C | 60 min at 37 $^{\circ}$ C | 4-hydroxy-quinoline |

|                                  |                                                   |                                                     |                                                                                                               |                              |                              |                          |
|----------------------------------|---------------------------------------------------|-----------------------------------------------------|---------------------------------------------------------------------------------------------------------------|------------------------------|------------------------------|--------------------------|
| Angiotensin<br>converting enzyme | Human<br>recombinant<br>mouse<br>myeloma<br>cells | 25.0 $\mu$ M Abz-<br>FRK (Dnp)-P                    | 50 mM MES (pH 6.5)                                                                                            | 15 min at 25<br>$^{\circ}$ C | 30 min at 25<br>$^{\circ}$ C | Abz-FR-OH                |
| Cathepsin G                      | Human<br>neutrophils                              | 10.0 $\mu$ M N-<br>succinyl-ala-ala-<br>pro-phe-AMC | 50 mM sodium acetate<br>(pH 5.5), 1 mM DTT, 2<br>mM EDTA                                                      | 15 min at 25<br>$^{\circ}$ C | 30 min at 25<br>$^{\circ}$ C | AMC                      |
| Phosphodiesterase<br>PDE3A       | Human<br>recombinant<br>Insect Sf9<br>cells       | 0.1 $\mu$ M FAM-<br>cAMP                            | 10 mM TRIS-HCl (pH<br>7.2), 10 mM<br>magnesium chloride,<br>0.05% sodium azide,<br>0.1% phosphate-free<br>BSA | 15 min at 25<br>$^{\circ}$ C | 15 min at 25<br>$^{\circ}$ C | Fluorescein-<br>AMP-IMAP |
| Phosphodiesterase<br>PDE4D2      | Human<br>recombinant                              | 0.1 $\mu$ M FAM-<br>cAMP                            | 10 mM TRIS-HCl (pH<br>7.2), 10 mM                                                                             | 15 min at 25<br>$^{\circ}$ C | 15 min at 25<br>$^{\circ}$ C | Fluorescein-<br>AMP-IMAP |



|                                               |                   |                              |                                                                                                                                          |                           |                           |                            |
|-----------------------------------------------|-------------------|------------------------------|------------------------------------------------------------------------------------------------------------------------------------------|---------------------------|---------------------------|----------------------------|
|                                               | Insect Sf9 cells  |                              | magnesium chloride, 0.05% sodium azide, 0.1% phosphate-free BSA                                                                          |                           |                           |                            |
| Serine/threonine protein kinase, PKC $\alpha$ | Human recombinant | 250 $\mu$ g/mL histone       | 20 mM HEPES (pH 7.2), 8 mM magnesium chloride, 0.08 mM calcium chloride, 100 $\mu$ g/mL phosphatidylserine, 20 $\mu$ g/mL diacylglycerol | 15 min at 25 $^{\circ}$ C | 10 min at 25 $^{\circ}$ C | [ $^{32}$ P]-histone       |
| Insulin receptor protein tyrosine kinase      | Human recombinant | 200 $\mu$ g/mL poly(glu:tyr) | 50 mM HEPES (pH 7.4), 10 mM magnesium chloride, 1 mM DTT, 200 $\mu$ M sodium orthovanadate,                                              | 15 min at 37 $^{\circ}$ C | 30 min at 37 $^{\circ}$ C | [ $^{32}$ P]-poly(glu:tyr) |
|                                               | Insect cells      |                              |                                                                                                                                          |                           |                           |                            |

|                                     |                                |                         |                                                                                                                |                 |                 |                                  |
|-------------------------------------|--------------------------------|-------------------------|----------------------------------------------------------------------------------------------------------------|-----------------|-----------------|----------------------------------|
|                                     |                                |                         | 2 mM manganese chloride                                                                                        |                 |                 |                                  |
| Lymphocyte-specific tyrosine kinase | Human recombinant Insect cells | 200 µg/mL poly(glu:tyr) | 50 mM HEPES (pH 7.4), 20 mM magnesium chloride, 1 mM DTT, 200 µM sodium orthovanadate, 2 mM manganese chloride | 15 min at 37 °C | 30 min at 37 °C | [ <sup>32</sup> P]-poly(glu:tyr) |

Vehicle for SPL026 and SPL028 was 1.0% dimethylsulfoxide was unless otherwise stated.

AMP-IMAP, adenosine monophosphate-immobilized metal ion affinity for phosphochemicals; BSA, bovine serum albumin; DTT, dithiothreitol; EDTA, ethylenediaminetetraacetic acid); FAM-cAMP, green fluorescent cyclic adenosine monophosphate; HEPES, 4-(2-hydroxyethyl)-1-piperazineethanesulfonic acid; MES, 2-(N-morpholino)ethanesulfonic acid; TRIS-HCl, tris(hydroxymethyl)aminomethane hydrochloride

## References

1. Cheng, Y.; Prusoff, W. H. Relationship between the inhibition constant ( $K_1$ ) and the concentration of inhibitor which causes 50 per cent inhibition ( $I_{50}$ ) of an enzymatic reaction. *Biochem. Pharmacol.* **1973**, 22, 3099–3108.
